# Supplementary material for: Tumor-intrinsic IRE1α signaling controls protective immunity in lung cancer
Source: PubMed Central journal article supplement (PMC9829901; doi:10.1038/s41467-022-35584-9), 2023-01-09
Supplement: 41467_2022_35584_MOESM1_ESM.pdf [file 41467_2022_35584_MOESM1_ESM.pdf]

Supplementary Information for

**Tumor-intrinsic IRE1 $\alpha$  signaling controls protective immunity in lung cancer.**

Crowley et al.

Supplementary Fig. 1 is related to Fig. 1

Supplementary Fig. 2 is related to Fig. 2

Supplementary Fig. 3 is related to Fig. 2

Supplementary Fig. 4 is related to Fig. 2

Supplementary Fig. 5 is related to Fig. 2

Supplementary Fig. 6 is related to Fig. 2

Supplementary Fig. 7 is related to Fig. 3

Supplementary Fig. 8 is related to Fig. 3

Supplementary Fig. 9 is related to Fig. 3

Supplementary Fig. 10 is related to Fig. 3

Supplementary Fig. 11 is related to Fig. 4

Supplementary Fig. 12 is related to Fig. 4

Supplementary Fig. 13 is related to Fig. 4

Supplementary Fig. 14 is related to Fig. 5

Supplementary Fig. 15 is related to Fig. 6

Supplementary Data 1 is related to Fig. 3

Supplementary Data 2 is related to Fig. 3

Supplementary Data 3 is related to Fig. 4

Supplementary Table 1 is related to Fig. 1

Supplementary Table 2 is related to Fig. 1

Supplementary Table 3 is related to Fig. 5

Supplementary Table 4. For all Figs.

Supplementary Table 5. For all Figs.

## a Human (hg19)

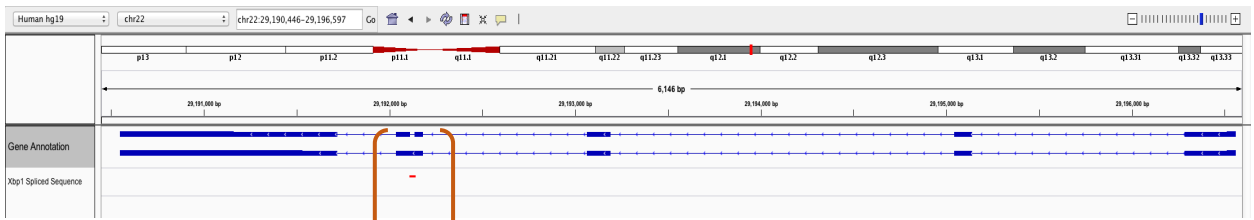

Exon 4

*XBP1* Splice sequence position

## b

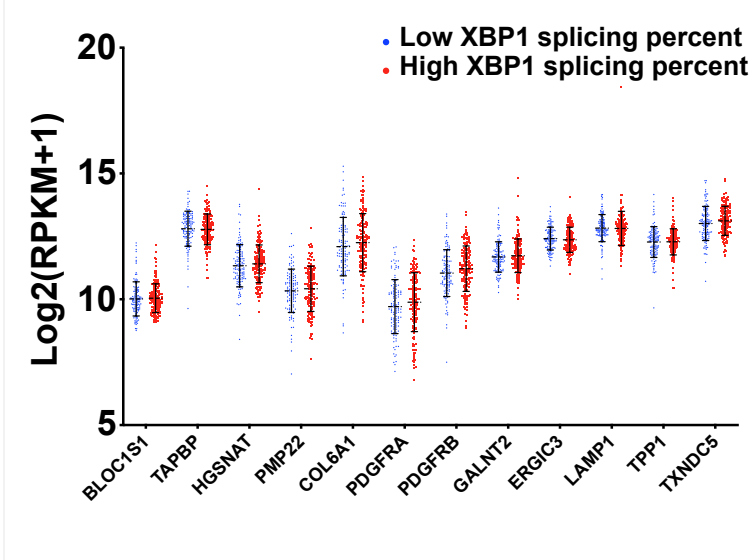

Supplementary Fig. 1. *XBP1s* pipeline, multivariate analysis and expression of RIDD targets in human TCGA LUAD.

a, Location of *XBP1* spliced sequence position in Exon 2.

b, Log<sub>2</sub> RPKM expression values of RIDD targets genes in *XBP1s* low (blue, n=103) and high (red, n=103) TCGA LUAD patients. Data are represented as mean ± SD.



# Supplementary Fig. 2

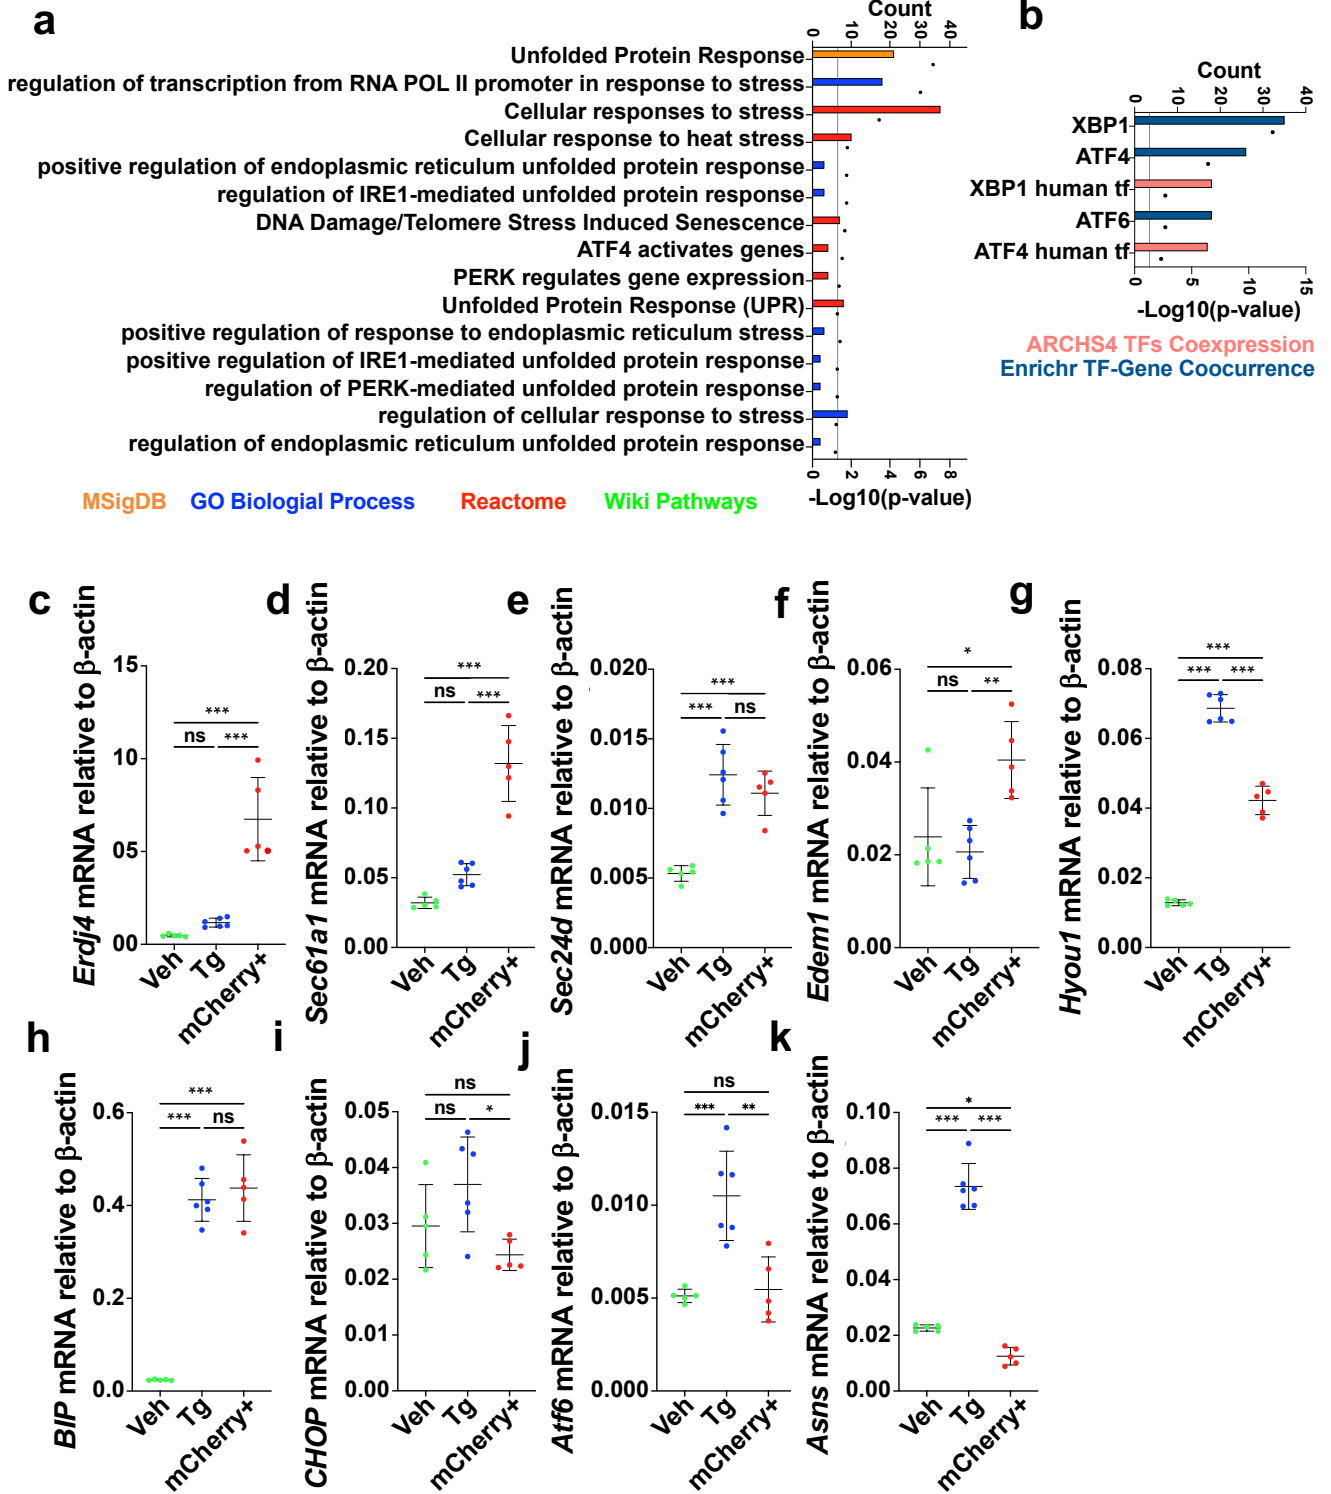

## Supplementary Fig. 2. IRE1 $\alpha$ -XBP1 signaling is activated in HKP1 tumor cells.

**a**, Top 15 upregulated terms enriched in HKP1 vs normal lung epithelial cells from MSigDB (orange), GO Biological Process (Blue), Reactome (Red) and Wiki Pathways (Green). The count of genes is on the upper y-axis represented as a barplot, and the  $-\log_{10}p$ -value is plotted on the lower y-axis, represented as a dot above its corresponding bar.

**b**, Top 5 transcription factors enriched in HKP1 vs normal lung epithelial cells from the ARCHS4 (pink), and EnrichR transcription factor co-occurrence (teal) databases. The count of genes is on the upper y-axis represented as a barplot, and the  $-\log_{10}p$ -value is plotted on the lower y-axis, represented as a dot above its corresponding bar.

**c-k**, RT-PCR of XBP1s target genes (Erdj4 (**c**, Veh vs Tg, P = NS, Veh vs mCherry P < 0.0001, Tg vs mCherry, P < 0.0001), Sec61a1 (**d**, Veh vs Tg, P = NS, Veh vs mCherry, P < 0.0001, Tg vs mCherry, P < 0.0001), Sec24d (**e**, Veh vs Tg, P < 0.0001, Veh vs mCherry p < 0.0001, Tg vs mCherry, P = NS), Edem1 (**f**, Veh vs Tg p = NS, Veh vs mCherry, P = 0.0186, Tg vs mCherry P = 0.0043), & Hyou1 (**g**, Veh vs Tg p < 0.0001, Veh vs mCherry p < 0.0001, Tg vs mCherry, P < 0.0001)) and global UPR markers (BIP (**h**, Veh vs Tg p < 0.0001, Veh vs mCherry, P < 0.0001, Tg vs mCherry p = NS), CHOP (**i**, Veh vs Tg, P = NS, Veh vs mCherry, P = NS, Tg vs mCherry, P = 0.0243), Atf6 (**j**, Veh vs Tg, P = 0.0007, Veh vs mCherry, P = NS, Tg vs mCherry, P = 0.0012), and Asns (**k**, Veh vs Tg, P < 0.0001, Veh vs mCherry, P = 0.0285, Tg vs mCherry, P < 0.0001)) in vehicle or Tg (n = 5 each) treated HKP1 cells *in vitro* or mCherry+ cells harvested from HKP1 tumors *in vivo* (n = 5). One-way ANOVA with Tukey's multiple comparisons test for ratios; \*P < 0.05, \*\*P < 0.001, \*\*\*P < 0.0001.

# Supplementary Fig. 3

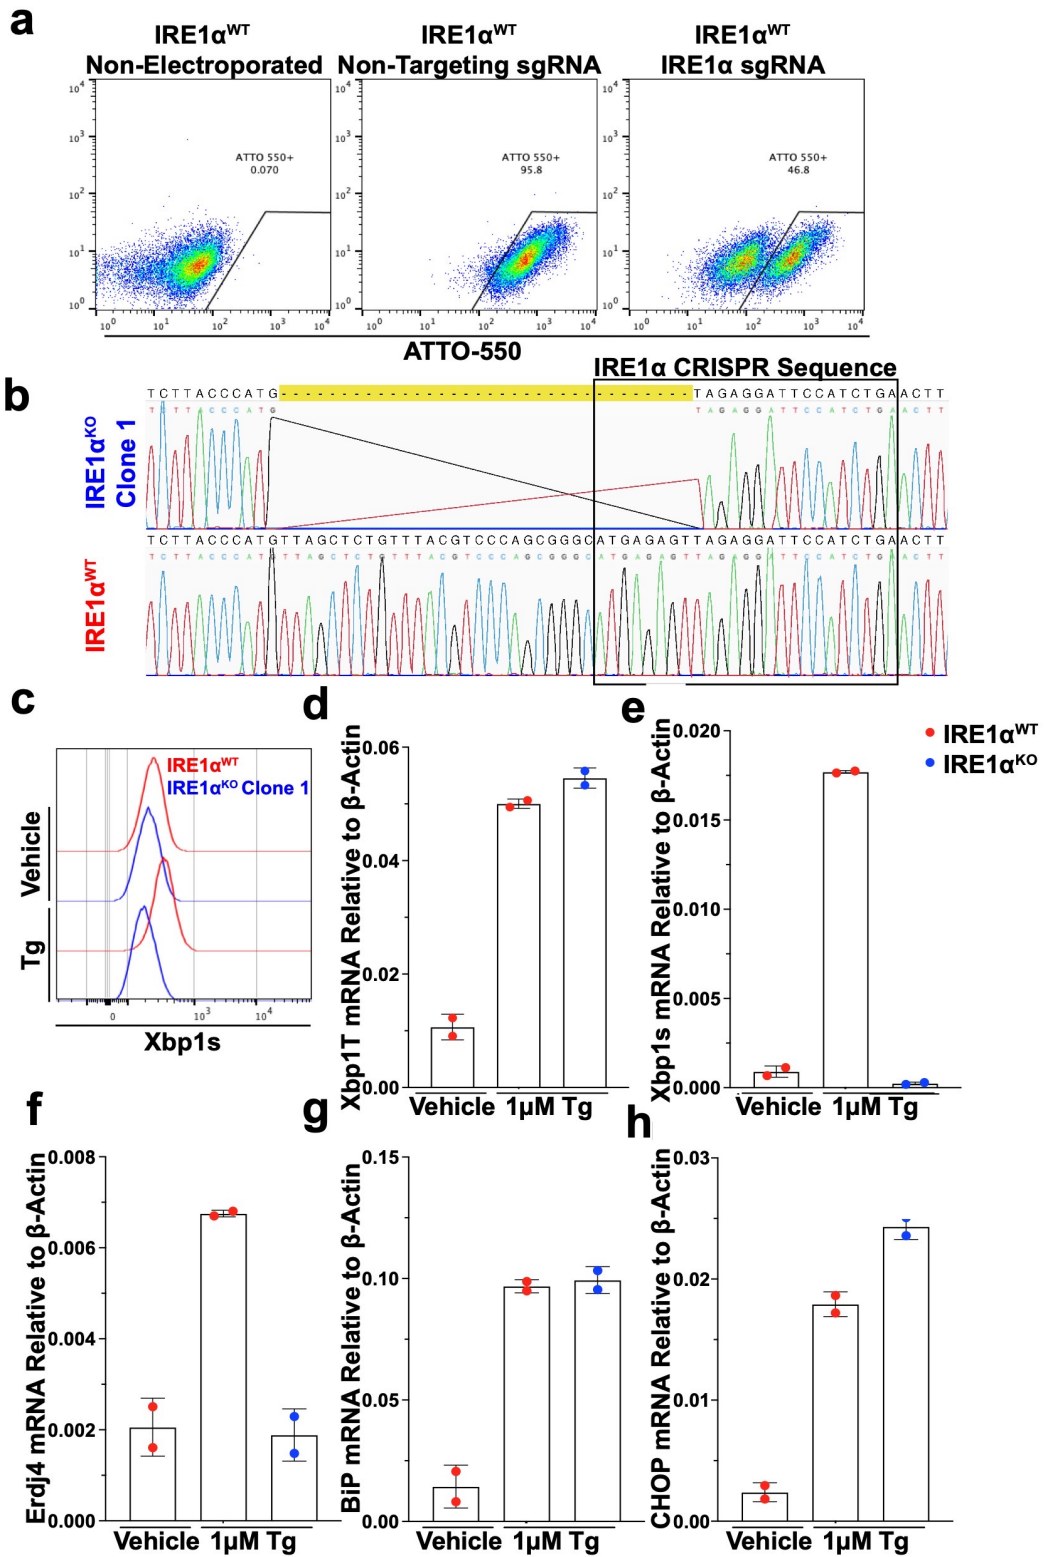

### Supplementary Fig. 3. Generation and screening of IRE1 $\alpha$ <sup>KO</sup> HKP1 clones.

**a**, Representative flow cytometry plot showing gating of NEON-electroporated HKP1 cells with fluorescently labeled ATTO-550 Tracr-RNA.

**b**, Fluorogram representation of Sanger sequencing of the IRE1 $\alpha$  CRISPR target sequence (black box), for an IRE1 $\alpha$ <sup>WT</sup> (red) and IRE1 $\alpha$ <sup>KO</sup> (blue) single colony clone.

**c**, Sample flow cytometry histogram of XBP1s protein expression, in Vehicle vs Thapsigargin treated IRE1 $\alpha$ <sup>WT</sup> (red) and IRE1 $\alpha$ <sup>KO</sup> (blue) single colony clones.

**d-h**, Barplot of qPCR of Vehicle (n=2) vs Thapsigargin (n=2) treated IRE1 $\alpha$ <sup>WT</sup> (red) or IRE1 $\alpha$ <sup>KO</sup> (blue) HKP1 cells for *total Xbp1* (**d**), *Xbp1s* (**e**), *Erdj4* (**f**), and non-IRE1/XBP1 targets *BiP* (**g**) and *CHOP* (**h**). Data are shown as mean  $\pm$  SD.

# Supplementary Fig. 4

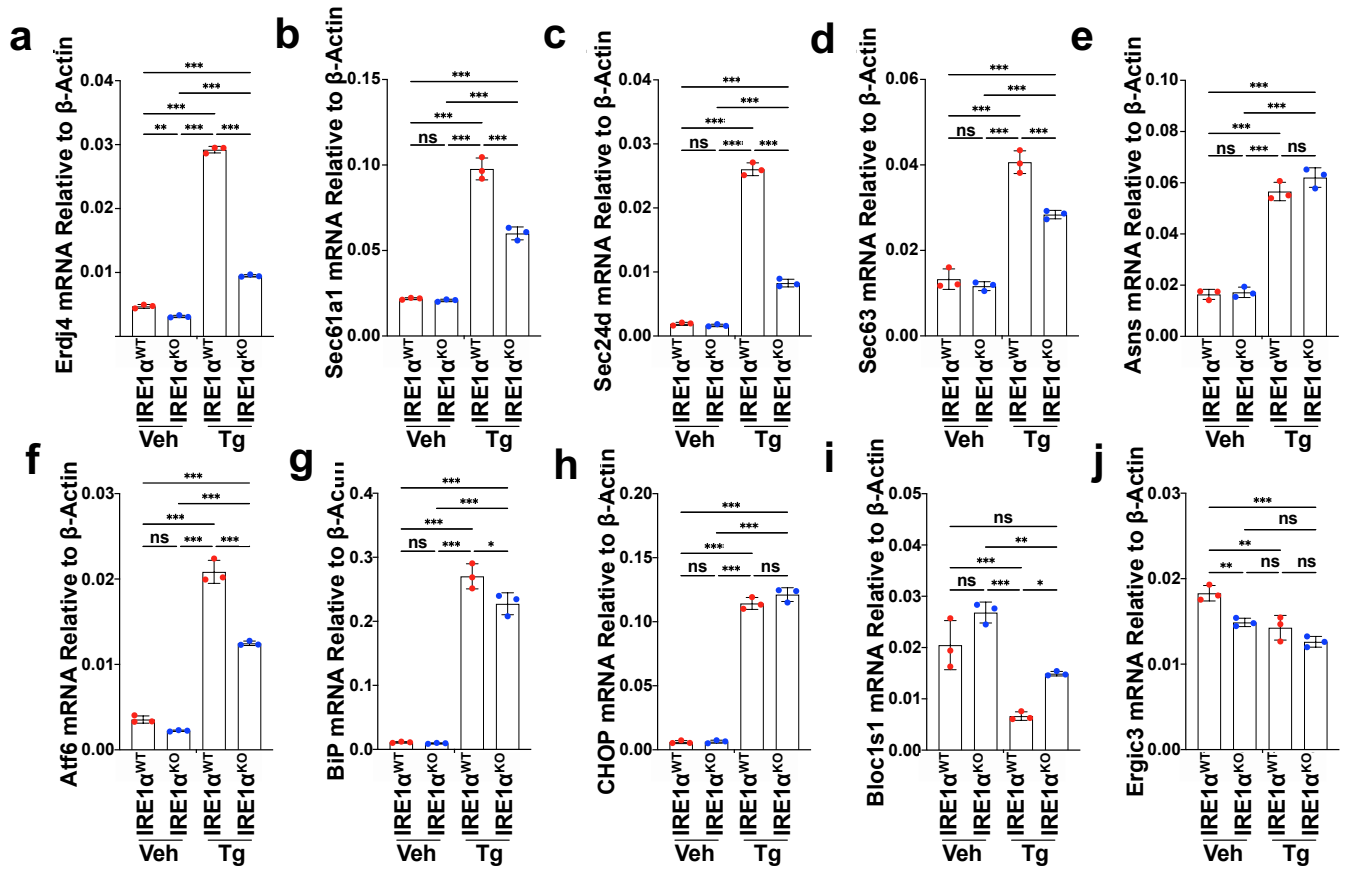

**Supplementary Fig. 4. *IRE1α* deletion does not induce compensatory UPR activation in *IRE1α*<sup>KO</sup> polyclonal HKP1 cells.**

**a-j**, Barplot of RT-PCR of *IRE1α*<sup>WT</sup> or *IRE1α*<sup>KO</sup> HKP1 cells (n=3 for each of the four conditions) treated with vehicle or 1μM Tg for 6 hours to evaluate canonical XBP1s target genes Erdj4 (**a**, Veh WT vs Tg WT, p<0.0001, Veh WT vs Veh KO, p=0.0015, Veh WT vs Tg KO, p <0.0001, Tg WT vs Veh KO, P <0.0001, Tg WT vs Tg KO, p <0.0001, Veh KO vs Tg KO, p <0.0001), Sec61a1 (**b**, Veh WT vs Tg WT, p <0.0001, Veh WT vs KO Veh, p=NS, Veh WT vs KO Tg, p <0.0001, Tg WT vs Veh KO, p <0.0001, Tg WT vs Tg KO, p <0.0001, Veh KO vs Tg KO p <0.0001), Sec24d (**c**, Veh WT vs Tg WT, p <0.0001, Veh WT vs Veh KO p=NS, Veh WT vs Tg KO, p <0.0001, Tg WT vs Veh KO, p <0.0001, Tg WT vs Tg KO p <0.0001, Veh KO vs Tg KO, p <0.0001), Sec63 (**d**, Veh WT vs Tg WT, p=NS, Veh WT vs VehKO p <0.0001, Veh WT vs TgKO p <0.0001, Tg WT vs Veh KO, p <0.0001, Tg WT vs Tg KO, p <0.0001, Veh KO vs Tg KO, p=0.0002), global UPR markers Asns (**e**, Veh WT vs Tg WT p = NS, Veh WT vs Veh KO, p <0.0001, Veh WT vs Tg KO, p <0.0001, Tg WT vs KO Veh p <0.0001, Tg WT vs TgKO p <0.0001, Veh KO vs TgKO p=NS), Atf6 (**f**, Veh WT vs Tg WT, p = ns, Veh WT vs KO Veh p <0.0001, Veh WT vs KO Tg p <0.0001, Tg WT vs KO Veh p <0.0001, Tg WT vs TgKO, p <0.0001, VehKO vs TgKO. p <0.0001), BiP (**g**, Veh WT vs Tg WT, p=NS, Veh WT vs Veh KO, p <0.0001, Veh WT vs KO Tg p <0.0001, Tg WT vs KO Veh p <0.0001, Tg WT vs KO Tg p <0.0001, KO Veh vs KO Tg p=0.0159), CHOP (**h**, Veh WT vs Tg WT p=NS, Veh WT vs KO Veh p <0.0001, Veh WT vs KO Tg p <0.0001, Tg WT vs KO Veh p <0.0001, Tg WT vs KO Tg p <0.0001, KO Veh vs KO Tg p=NS) and RIDD target genes (Bloc1s1 (**i**, Veh WT vs Tg WT. p=0.072, Veh WT vs VehKO, p=0.0009, Veh WT vs TgKO, p=NS, Tg WT vs KO Veh, p <0.0001, Tg WT vs TgKO p, =0.0025, VehKO vs TgKO p=0.0209), and Ergic3 (**j**, Veh WT vs Tg WT, p=0.0094, Veh WT vs KO Veh p=0.0034, Veh WT vs KO Tg p=0.0003, Tg WT vs VehKO, p=0.8467, Tg WT vs TgKO, p = 0.0703, VehKO vs TgKO, p =NS). 1-way ANOVAs with Tukey's multiple comparisons test; \*P < 0.05, \*\*P < 0.001, \*\*\*P < 0.0001. Data are shown as mean ± SD.

## Supplementary Fig. 5

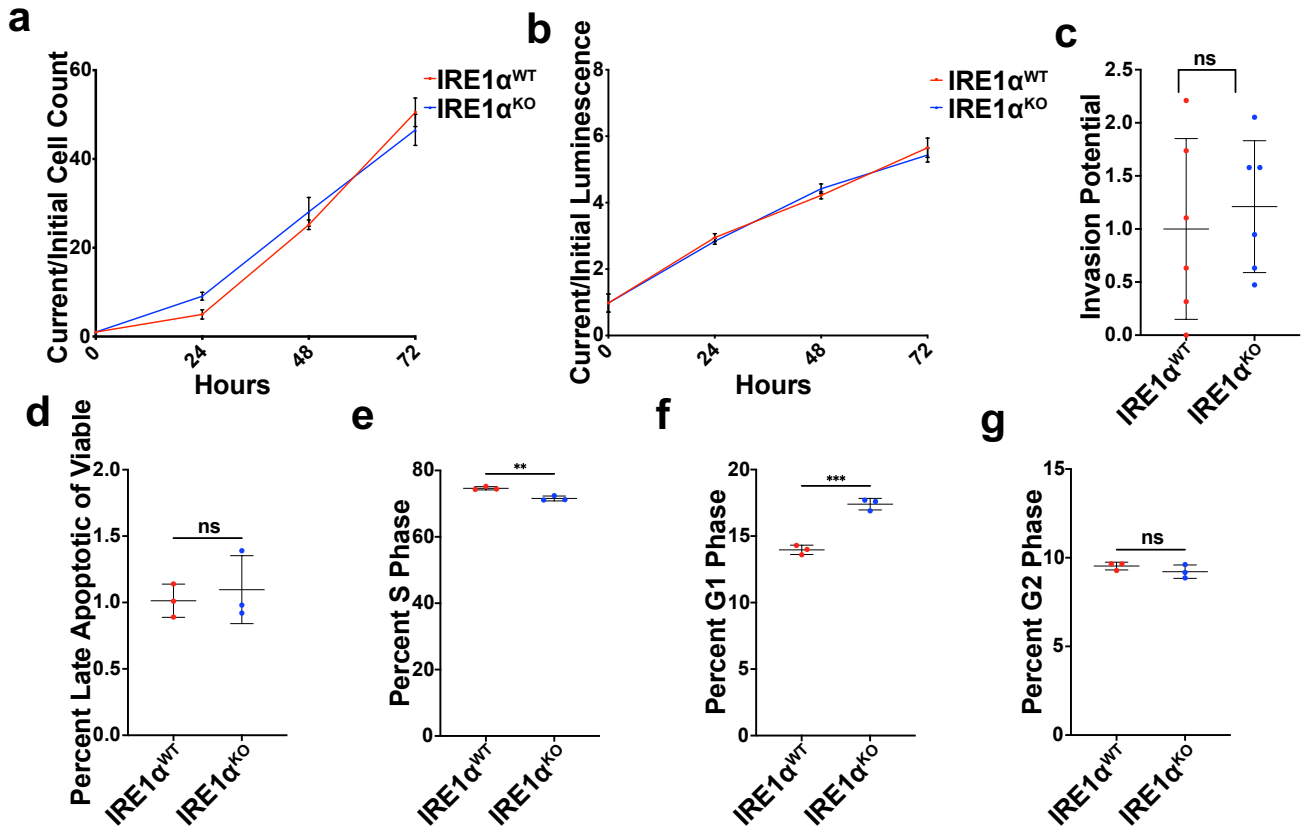

**Supplementary Fig. 5. Impact of *IRE1 $\alpha$*  loss in *in vitro* cancer cell kinetics in the absence of exogenous ER stress.**

Proliferation (a), viability (b), apoptosis (c), invasion potential (d), and cell cycle (e-g) in *IRE1 $\alpha^{WT}$*  (red, n=3 for all assays) or *IRE1 $\alpha^{KO}$*  (blue, n=3 for all assays) HKP1 cells. Line graphs are presented with mean values as a symbol  $\pm$  SD at each time point. Box and whisker plots are presented as mean  $\pm$  SD. Unless otherwise stated, One-way ANOVA with Tukey's multiple comparisons test for ratios, 2-way ANOVAs with Tukey's multiple comparisons test for all other analyses; \* $P < 0.05$ , \*\* $P < 0.001$ , \*\*\* $P < 0.0001$ .

# Supplementary Fig. 6

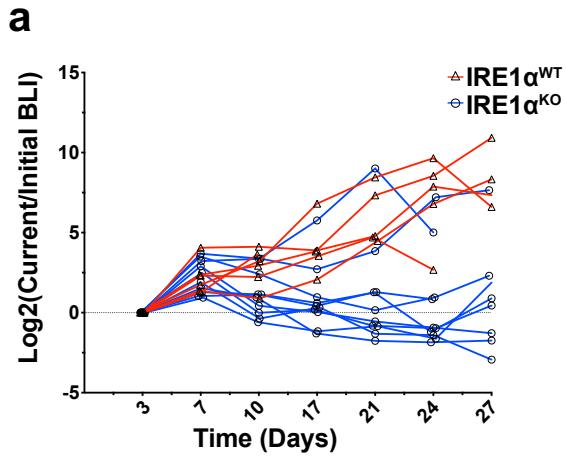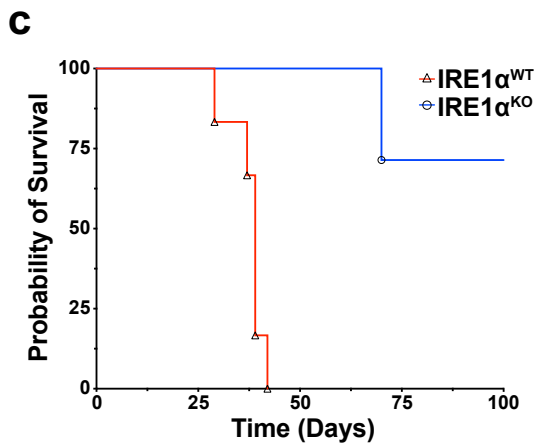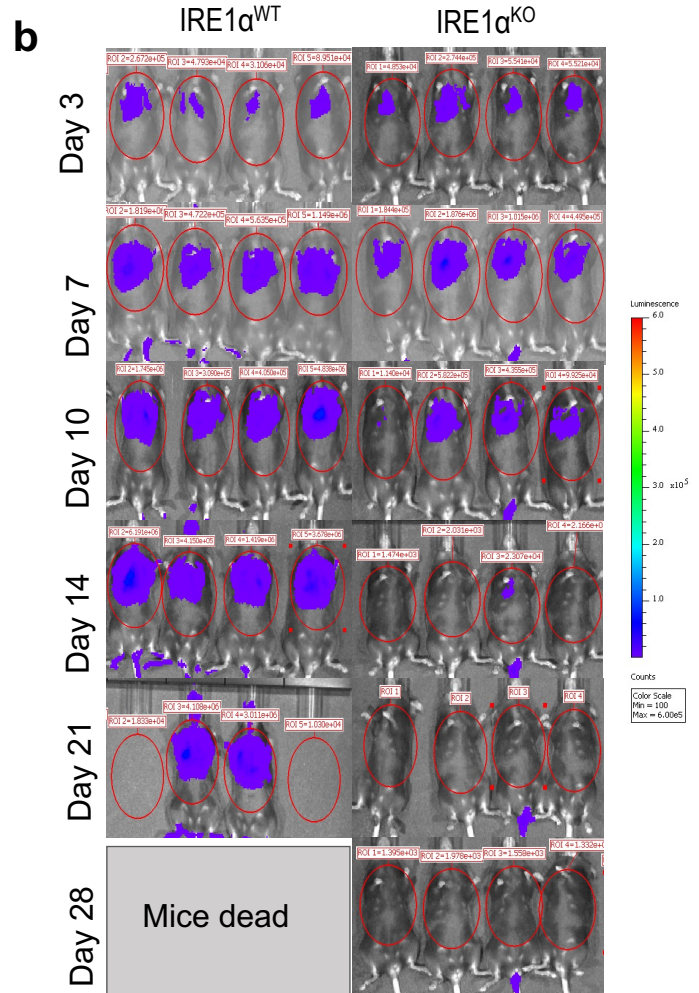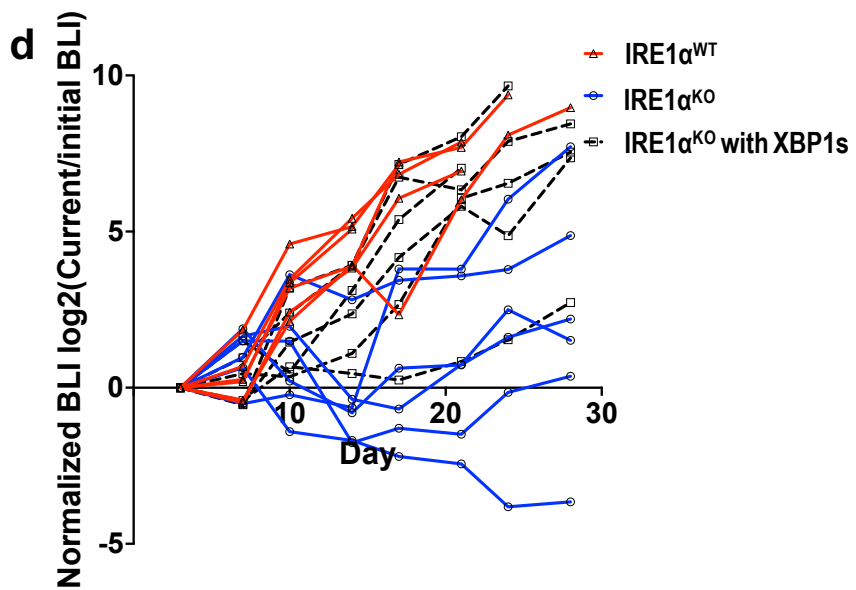



**Supplementary Fig. 6. Cancer cell-intrinsic IRE1 $\alpha$  deficiency impairs tumor growth and improves survival.**

**a**, BLI spider plots of longitudinally tracked *in vivo* IRE1 $\alpha$ <sup>WT</sup> (red, n = 6) vs IRE1 $\alpha$ <sup>KO</sup> (blue, n = 10) HKP1 tumors. Data are shown as individual tracings of mice, relative to their log transformed day 3 measurement. Analyses of different time points in tumor progression were performed using 2-way ANOVA with Tukey's multiple comparisons test; \* $P < 0.05$ , \*\* $P < 0.001$ , \*\*\* $P < 0.0001$

**b**, Bioluminescence images of representative individual mice as a function of time from IRE1 $\alpha$ <sup>WT</sup> and IRE1 $\alpha$ <sup>KO</sup> mice.

**c**, Kaplan-Meier plots showing probability of overall survival in IRE1 $\alpha$ <sup>WT</sup> (red, n=10) vs IRE1 $\alpha$ <sup>KO</sup> (blue, n=10) CMT-167 tumor bearing mice ( $P < 0.001$ ).

**d**, BLI spider plots of longitudinally tracked *in vivo* IRE1 $\alpha$ <sup>WT</sup> empty vector (red, n = 5), IRE1 $\alpha$ <sup>KO</sup> empty vector (blue, n = 5) and IRE1 $\alpha$ <sup>KO</sup> expressing *Xbp1s* cDNA (black, n = 5) HKP1 tumors. Data are shown as individual tracings of mice, relative to their log transformed day 3 measurement. Data pooled from two independent experiments. ( $P < 0.001$  for IRE1 $\alpha$ <sup>WT</sup> vs. IRE1 $\alpha$ <sup>KO</sup>;  $P < 0.002$  for IRE1 $\alpha$ <sup>KO</sup> vs. IRE1 $\alpha$ <sup>KO</sup> expressing *Xbp1s* cDNA at day 28). Analyses of different time points in tumor progression were performed using 2-way ANOVA with Tukey's multiple comparisons test.

# Supplementary Fig. 7

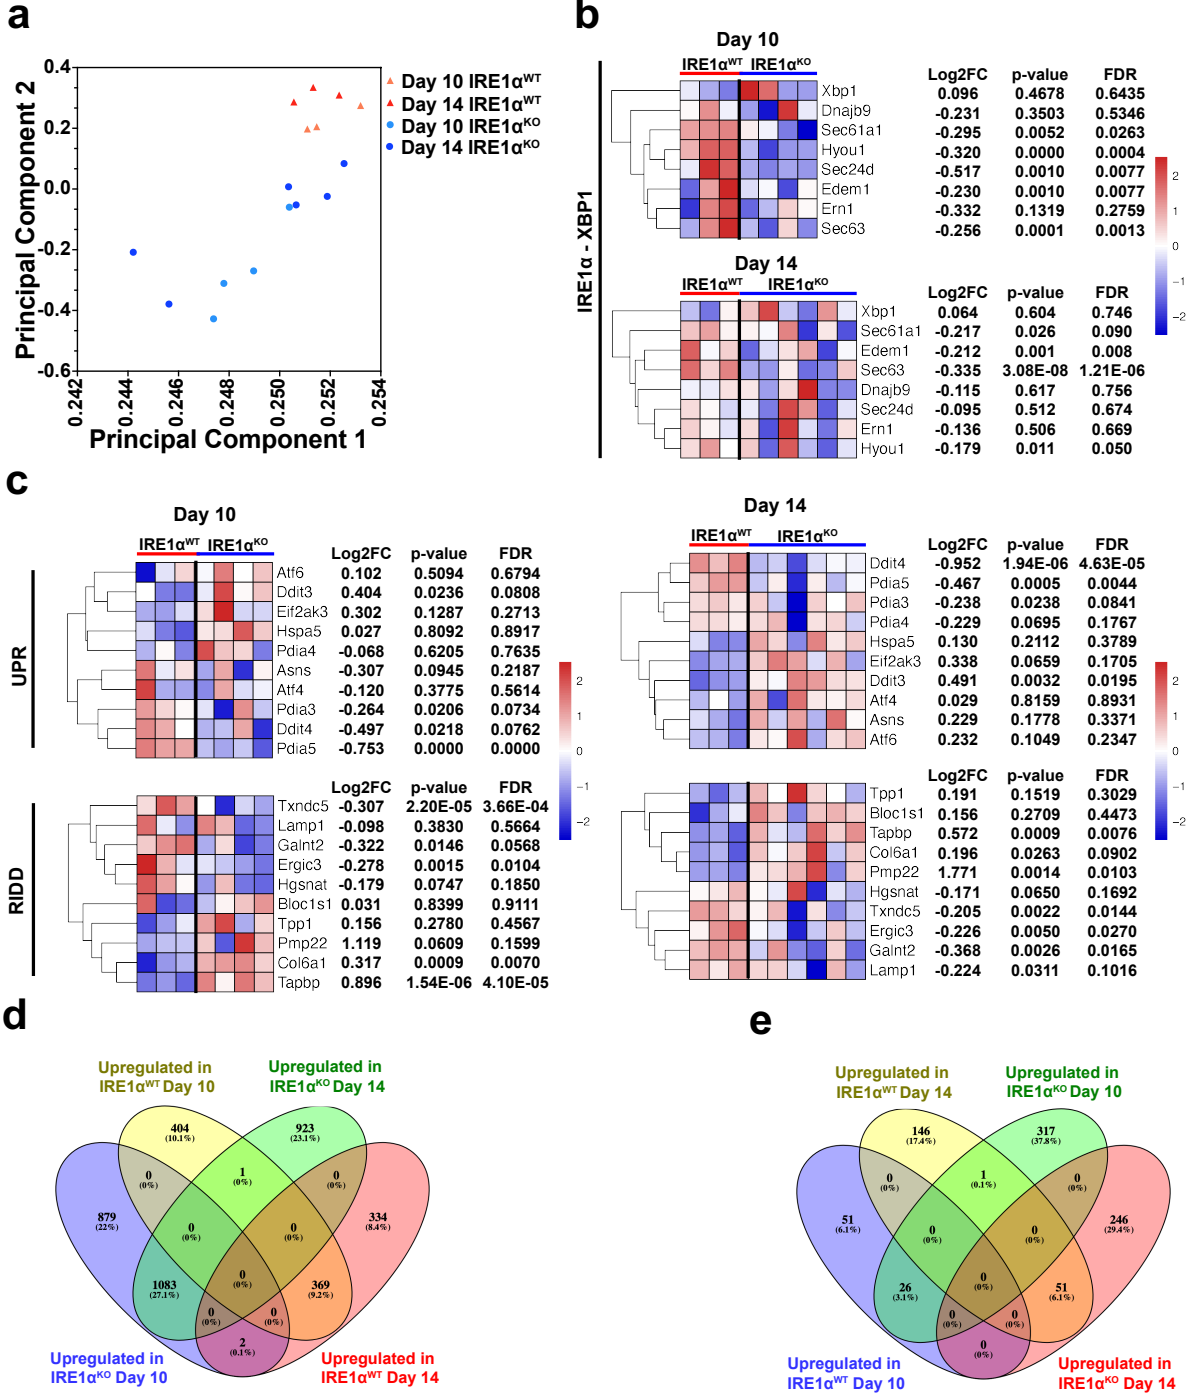

**Supplementary Fig. 7. RNA-seq analysis of mcherry+ sorted  $IRE1\alpha^{WT}$  vs.  $IRE1\alpha^{KO}$  cancer cells from HKP1 tumors.**

**a**, X-Y scatterplot of the first two principal components from mRNA-sequencing of  $IRE1\alpha^{WT}$  (orange day 10, red day 14) vs  $IRE1\alpha^{KO}$  (aqua day 10, blue, day 14) HKP1 tumor cells.

**b-c**, Heatmap of row normalized log2 FPKM values evaluating enrichment for  $IRE1\alpha$ - $XBP1$ (**a**), UPR and RIDD targets (**b**) in  $IRE1\alpha^{WT}$  vs  $IRE1\alpha^{KO}$  HKP1 tumor cells at day 10 and 14.

**d-e**, Venn diagrams of differentially expressed genes between WT and KO cells over time (**e**) and changes in gene expression within each group over time (**f**). Differentially expressed gene cutoffs were at Log2 Fold Change > 0.5,  $P < 0.05$ , FDR < 10%.

# Supplementary Fig. 8

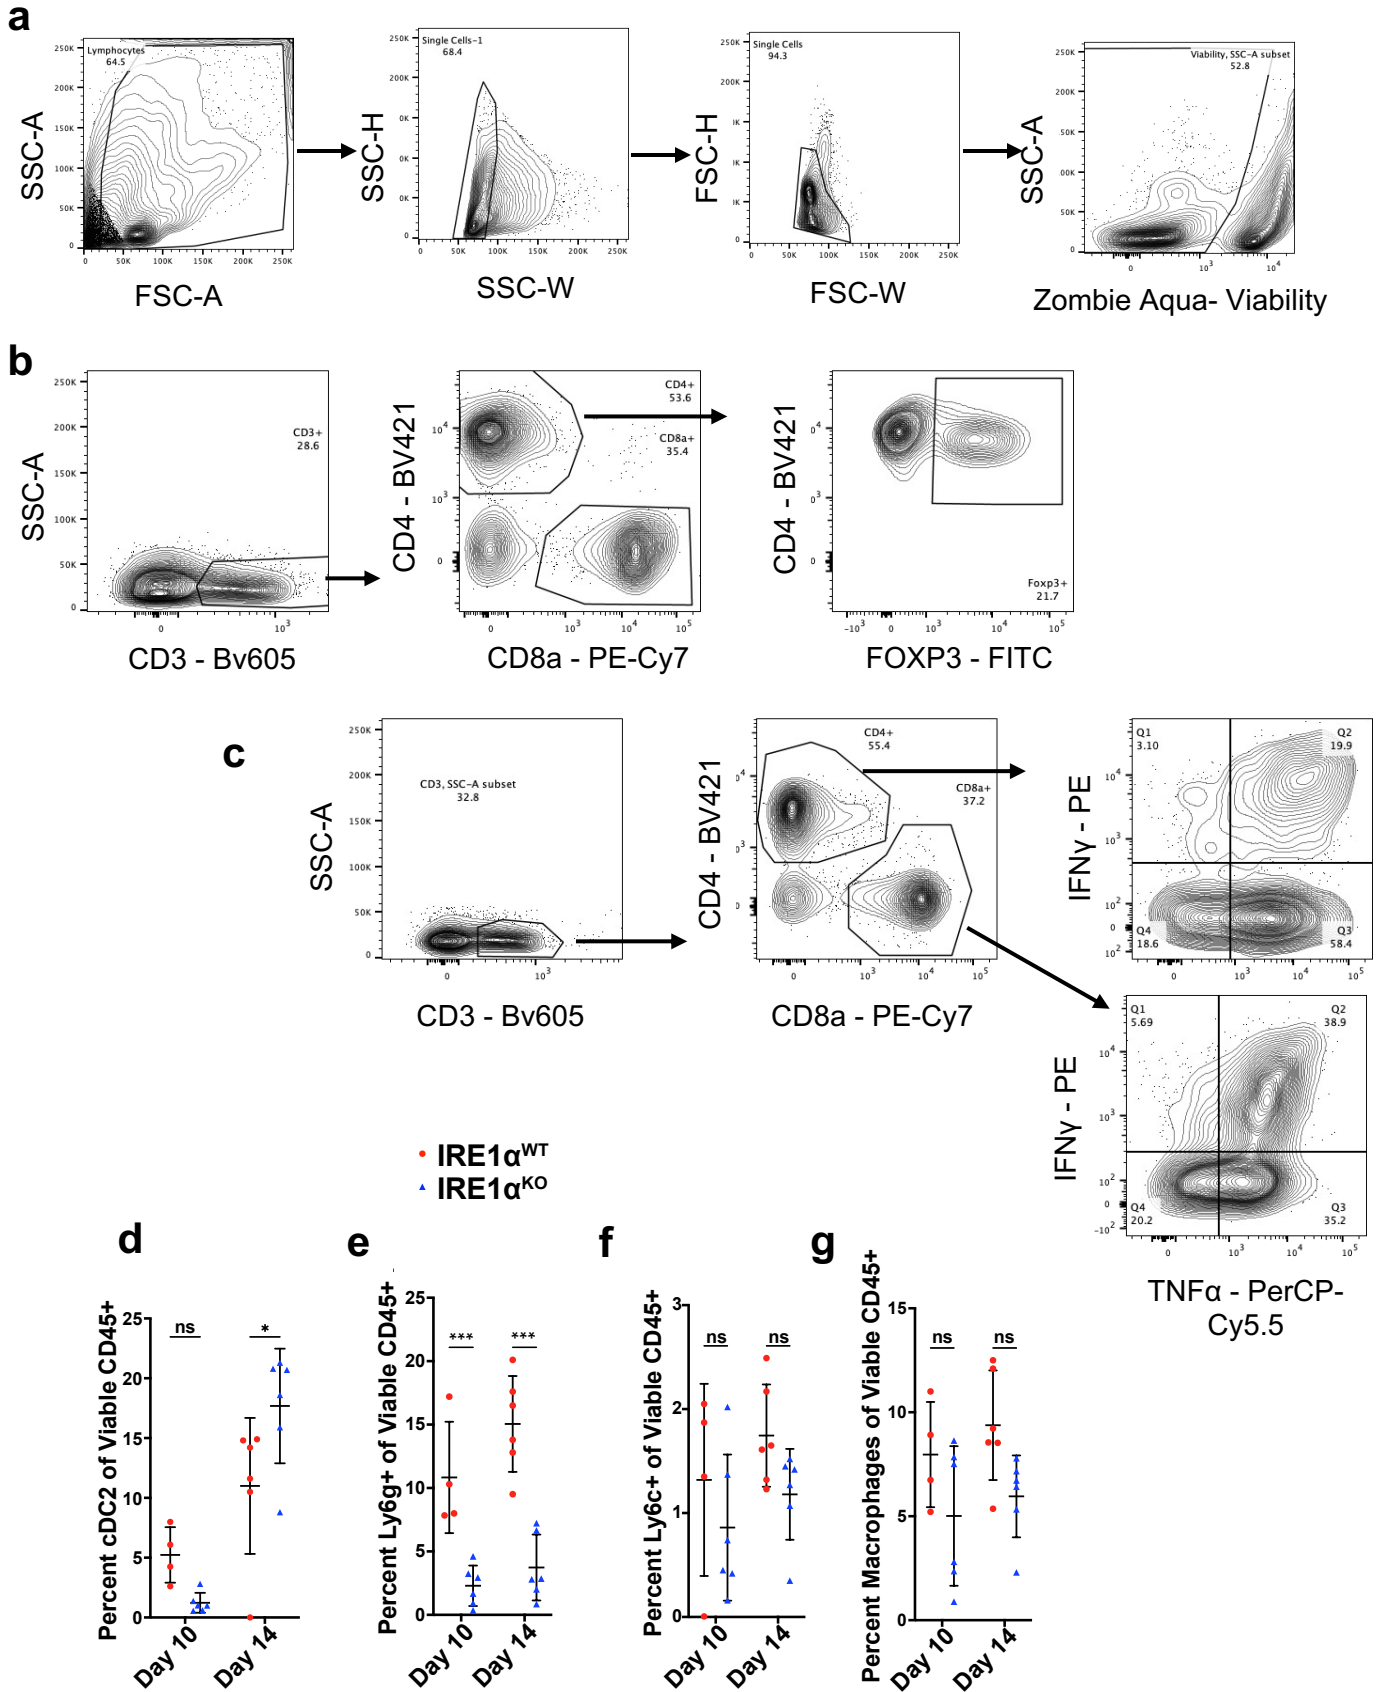

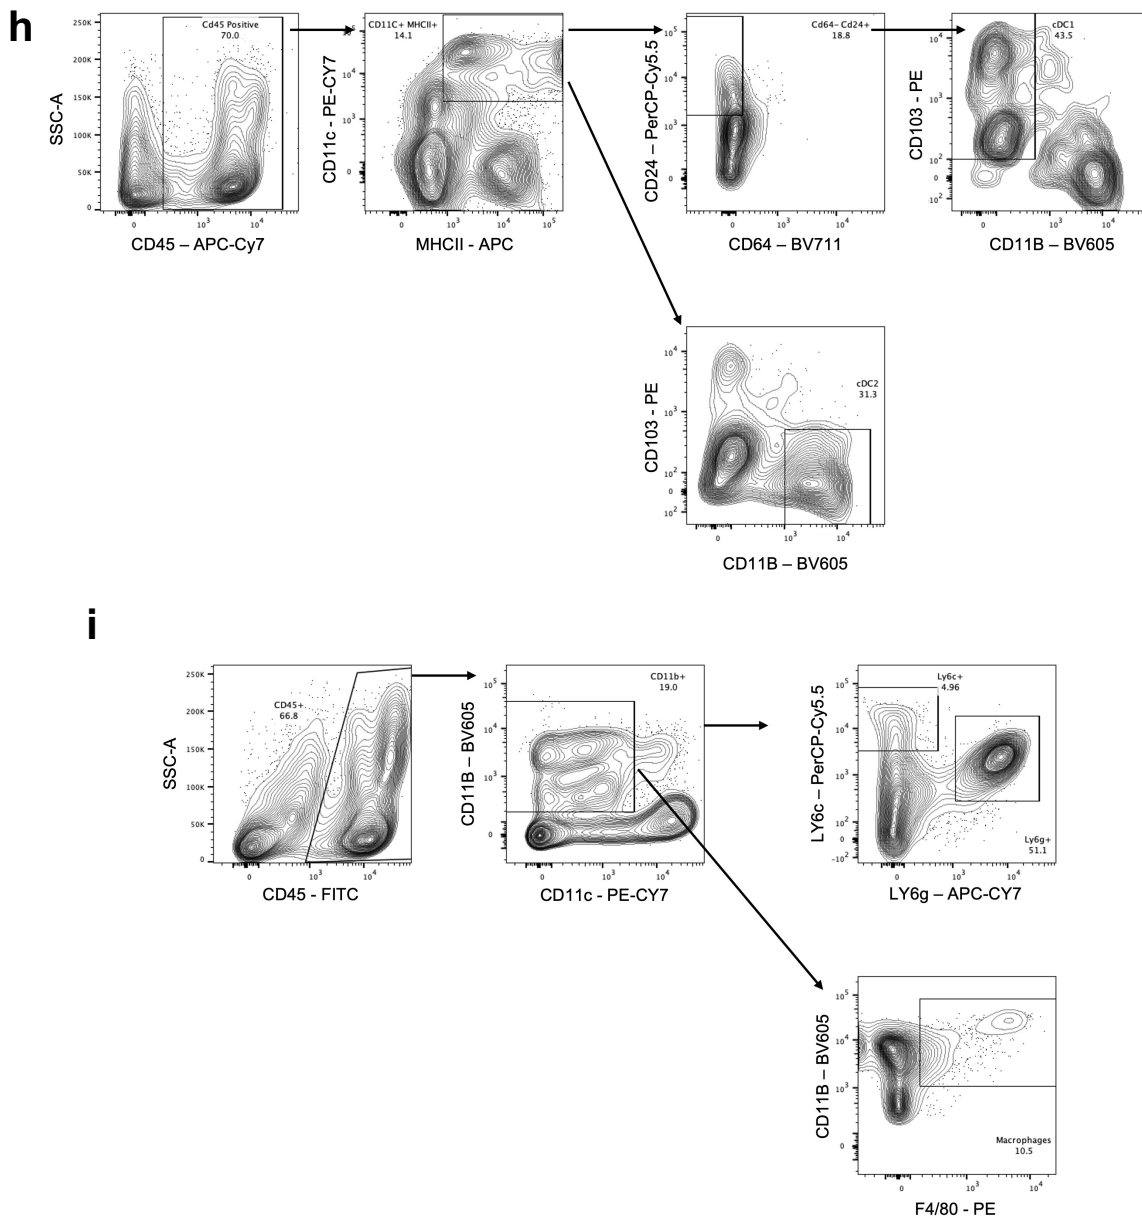

**Supplementary Fig. 8. Gating strategy for immune cell populations and quantification of myeloid populations in  $IRE1\alpha^{WT}$  vs  $IRE1\alpha^{KO}$  HKP1 tumors.**

**a-c**, Gating strategy for flow cytometry of live/dead cells (**a**), Lymphocytes (**b**), CD4 and CD8 effector T cells (**c**).

**d-g**, Flow cytometry data from  $IRE1\alpha^{WT}$  (red) vs  $IRE1\alpha^{KO}$  (blue) HKP1 tumor bearing lungs at day 10 (n=4  $IRE1\alpha^{WT}$  and n=6  $IRE1\alpha^{KO}$ ) and 14 (n=6  $IRE1\alpha^{WT}$  and n=7  $IRE1\alpha^{KO}$ ), showing conventional dendritic cells type 2 (**d**, day 10, P = NS, day 14, P = 0.0263), PMN-MDSCs (**e**, day 10, P = 0.001, day 14, P < 0.0001), Mo-MDSCs (**f**, day 10, P = NS, day 14, P = NS) and Macrophages (**g**, day 10, P = NS, day 14, P = NS). Data are shown as mean  $\pm$  SD. 2-way ANOVA with Tukey's multiple comparisons test; \*P < 0.05, \*\*P < 0.001, \*\*\*P < 0.0001, ns, non-significant.

**h-i** Gating strategy for flow cytometry of Myeloid cells including cDC1, cDC2 (**h**) and Ly6G and Ly6C MDSCs and Macrophages (**i**).

Unless otherwise stated, One-way ANOVA with Tukey's multiple comparisons test for ratios, 2-way ANOVAs with Tukey's multiple comparisons test for all other analyses; \*P < 0.05, \*\*P < 0.001, \*\*\*P < 0.0001.

# Supplementary Fig. 9

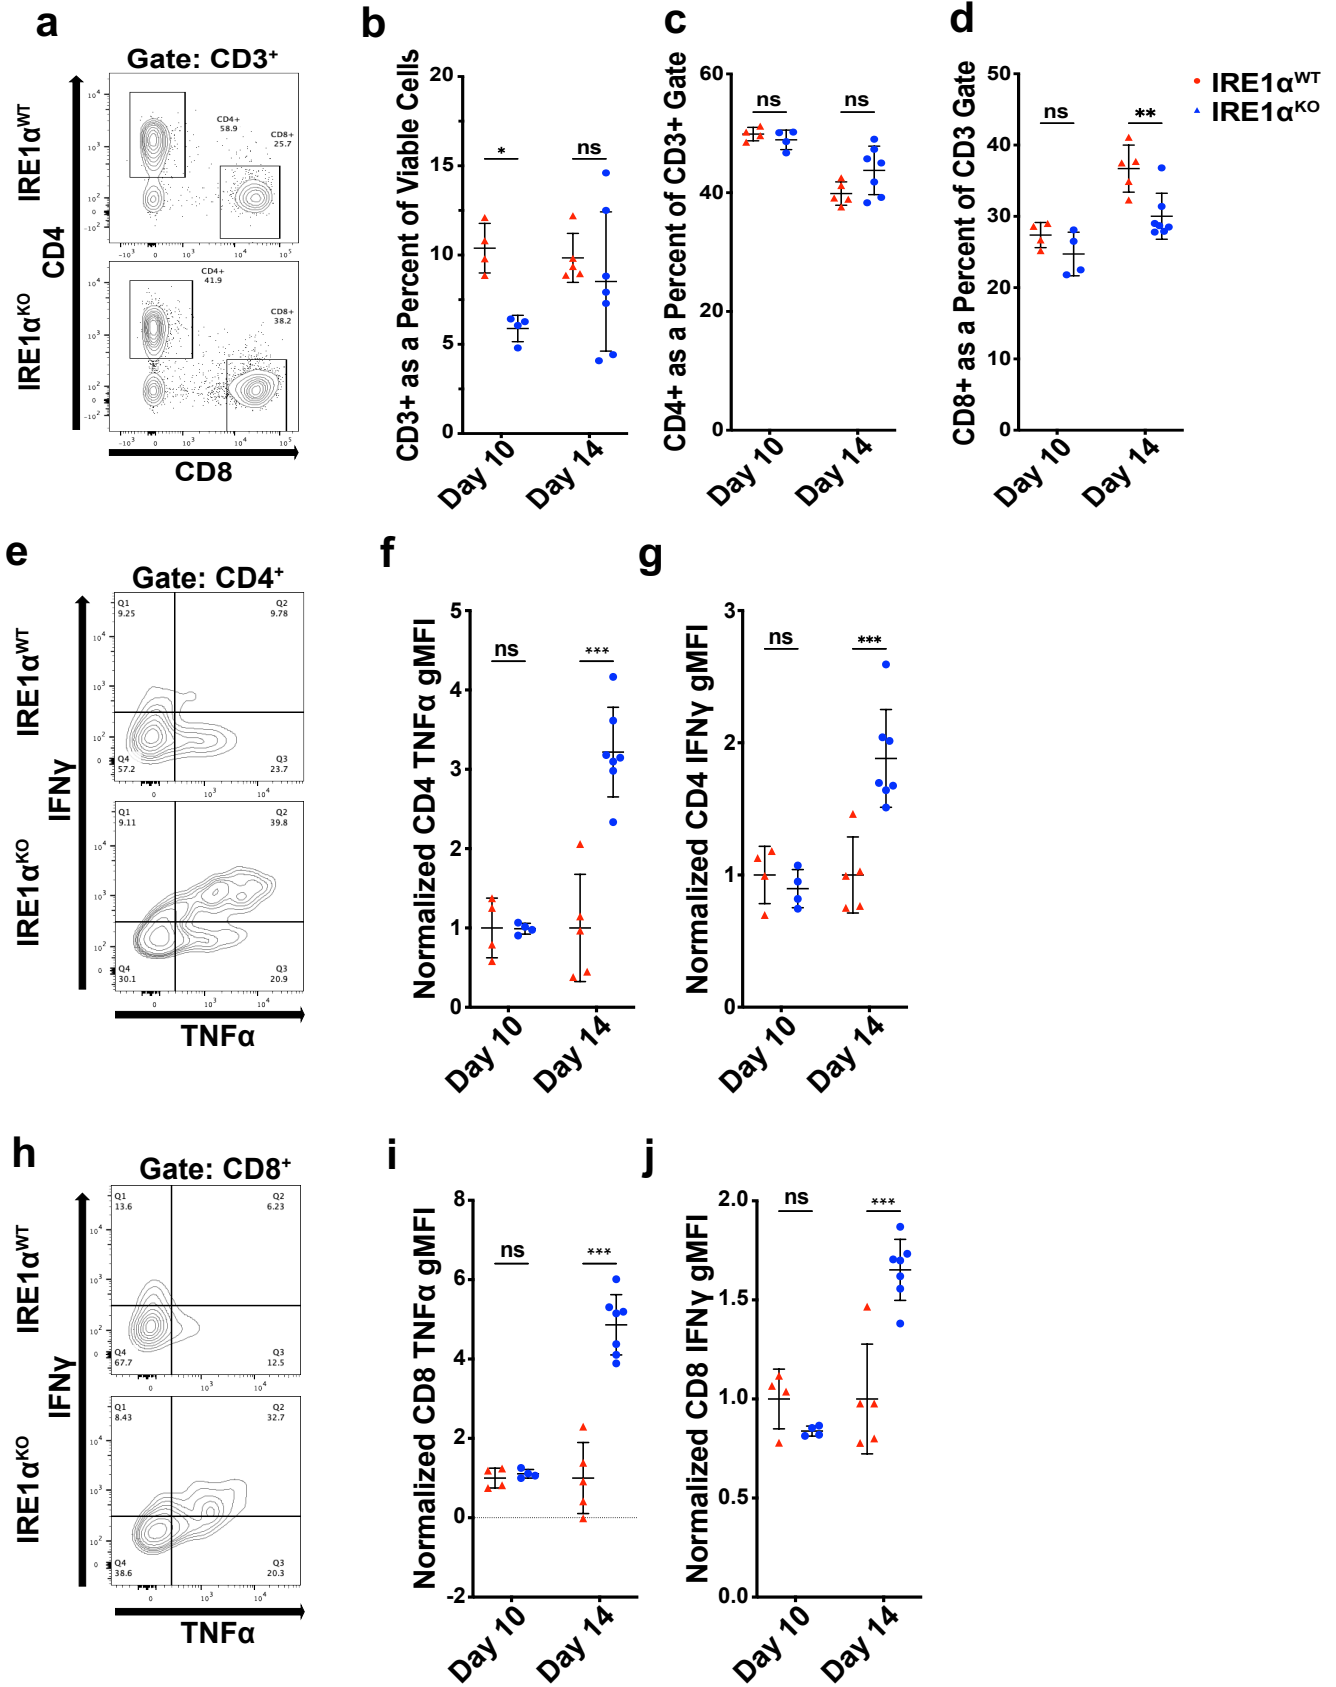

**Supplementary Fig. 9. Quantification of T cells in  $IRE1\alpha^{WT}$  and  $IRE1\alpha^{KO}$  HKP1 tumor bearing lungs at days 10 and 14.**

**a**, Representative flow cytometry scatter plot showing CD4 and CD8 T cells (Gated for CD3) from  $IRE1\alpha^{WT}$  and  $IRE1\alpha^{KO}$  HKP1 lungs.

**b-d**, Flow cytometry data from  $IRE1\alpha^{WT}$  (red) vs  $IRE1\alpha^{KO}$  (blue) HKP1 tumor bearing lungs at day 10 (n=4,  $IRE1\alpha^{WT}$  and n=6  $IRE1\alpha^{KO}$ ) and 14 (n=6,  $IRE1\alpha^{WT}$  and n=7  $IRE1\alpha^{KO}$ ), of viable CD3 (**b**, day 10  $P = 0.0113$ , day 14,  $P = NS$ ), CD4 (**c**, day 10,  $P = NS$ , day 14,  $P = NS$ ), and CD8 (**d**, day 10,  $P = NS$ , day 14,  $P = 0.003$ ) T lymphocytes. Data are shown as mean  $\pm$  SD. 2-way ANOVA with Tukey's multiple comparisons test; \* $P < 0.05$ , \*\* $P < 0.001$ , \*\*\* $P < 0.000$ , ns, non-significant.

**e**, Representative flow cytometry scatter plot showing  $IFN\gamma/TNF\alpha^+$  T cells (Gated for CD4) from  $IRE1\alpha^{WT}$  and  $IRE1\alpha^{KO}$  HKP1 lungs.

**f-g**, gMFI of normalized  $TNF\alpha^+$  (**f**, day 10  $p = NS$ , day 14,  $P = 0.0002$ ) and  $IFN\gamma$  (**g**, day 10,  $P = NS$ , day 14,  $P < 0.0001$ ) gMFI for CD4+ T cells from  $IRE1\alpha^{WT}$  (red) vs  $IRE1\alpha^{KO}$  (blue) HKP1 tumor bearing lungs at day 10 (n=4,  $IRE1\alpha^{WT}$  and n=6  $IRE1\alpha^{KO}$ ) and 14 (n=6,  $IRE1\alpha^{WT}$  and n=7  $IRE1\alpha^{KO}$ ). Data are shown as mean  $\pm$  SD. 2-way ANOVA with Tukey's multiple comparisons test; \* $P < 0.05$ , \*\* $P < 0.001$ , \*\*\* $P < 0.000$ , ns, non-significant.

**h**, Representative flow cytometry scatter plot showing  $IFN\gamma/TNF\alpha^+$  T cells (Gated for CD8) from  $IRE1\alpha^{WT}$  and  $IRE1\alpha^{KO}$  HKP1 lungs.

**i-j**, gMFI of normalized  $TNF\alpha^+$  (**i**, day 10,  $p = NS$ , day 14,  $P < 0.0001$ ) and  $IFN\gamma$  (**j**, day 10,  $P = NS$ , day 14,  $P < 0.0001$ ) gMFI for CD8+ T cells from  $IRE1\alpha^{WT}$  (red) vs  $IRE1\alpha^{KO}$  (blue) HKP1 tumor bearing lungs at day 10 (n=4  $IRE1\alpha^{WT}$  and n=6  $IRE1\alpha^{KO}$ ) and 14 (n=6  $IRE1\alpha^{WT}$  and n=7  $IRE1\alpha^{KO}$ ). Data are shown as mean  $\pm$  SD. 2-way ANOVA with Tukey's multiple comparisons test; \* $P < 0.05$ , \*\* $P < 0.001$ , \*\*\* $P < 0.000$ , ns, non-significant.

## Supplementary Fig. 10

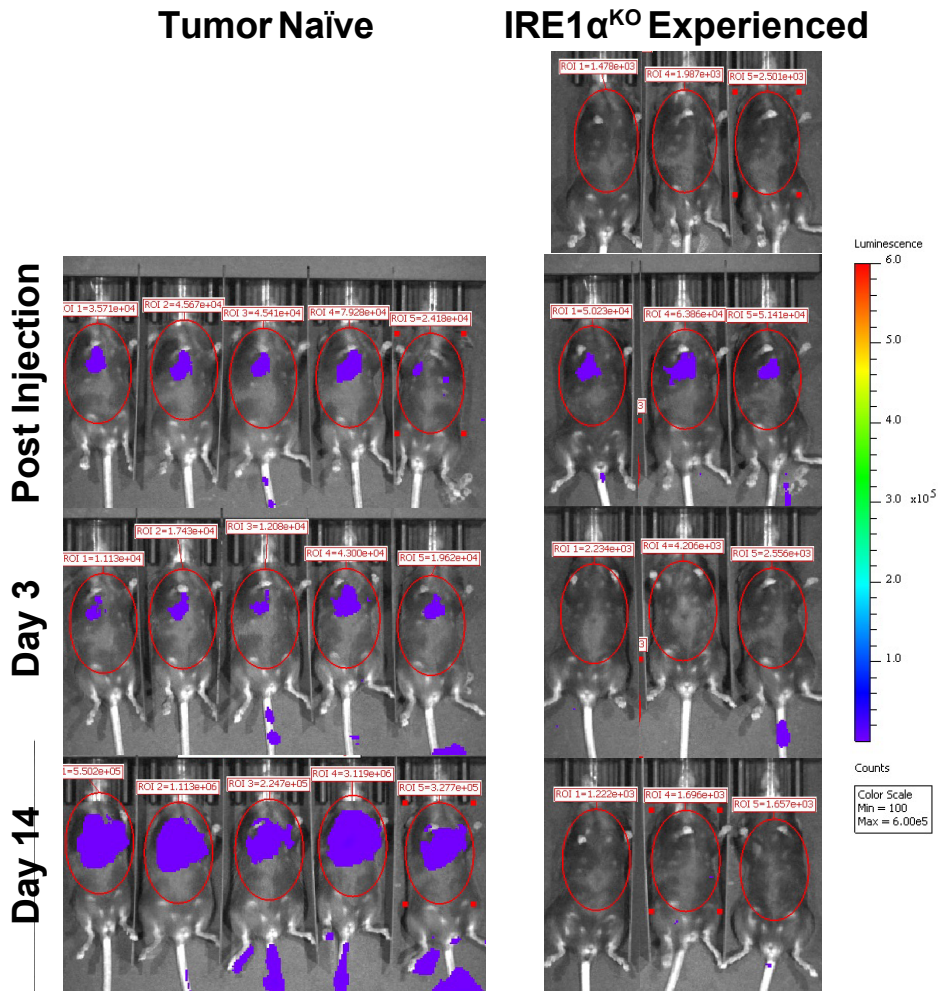

**Supplementary Fig. 10: Tumor free mice in the IRE1 $\alpha$ <sup>KO</sup> HKP1 cohort are refractory to tumor re-challenge.**

Normalized BLI plots of tumor re-challenge experiments. Aged matched tumor naïve (left) and IRE1 $\alpha$ <sup>KO</sup> HKP1 tumor experienced survivor mice (right), prior to, and post administration with parental HKP1.

Unless otherwise stated, One-way ANOVA with Tukey's multiple comparisons test for ratios, 2-way ANOVAs with Tukey's multiple comparisons test for all other analyses; \* $P < 0.05$ , \*\* $P < 0.001$ , \*\*\* $P < 0.0001$ .



# Supplementary Fig. 11

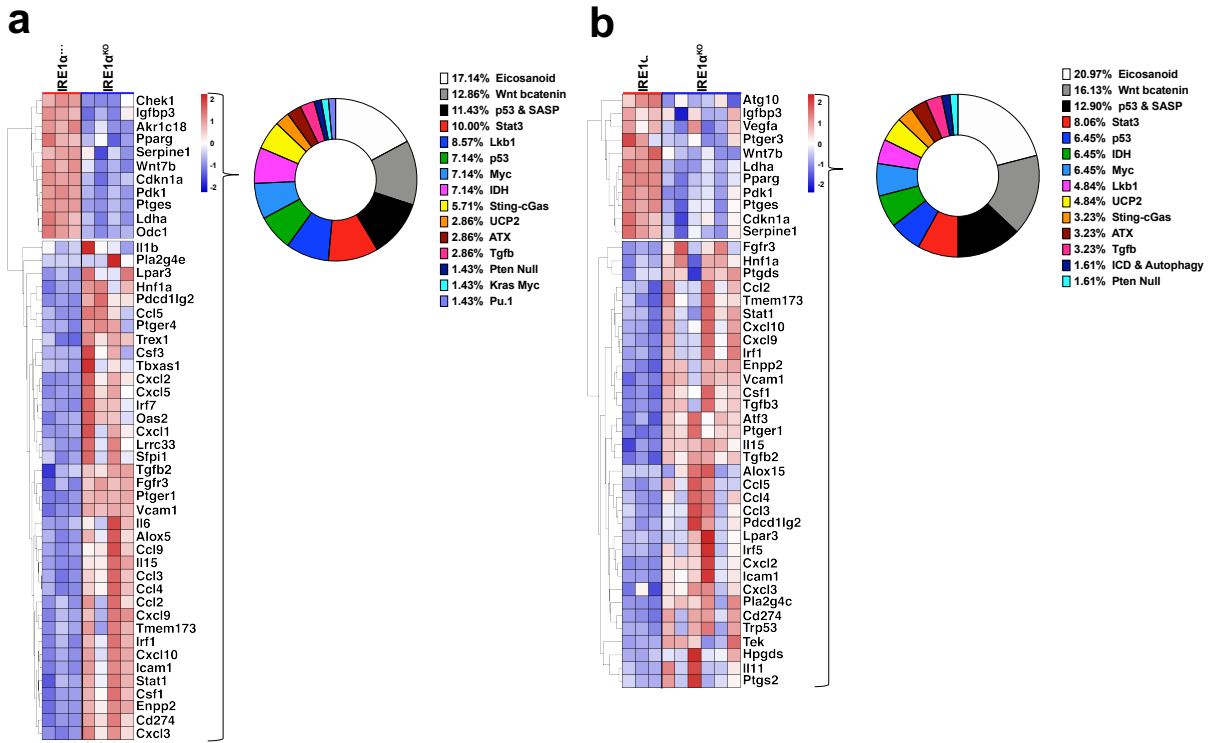

## Supplementary Fig. 11.

**a-b**, Heatmaps of differentially expressed genes between *IRE1α*<sup>KO</sup> vs. *IRE1α*<sup>WT</sup> HKP1 cells from the Immunomodulator database at day 10 (**a**), and 14 (**b**).

## Supplementary Fig. 12

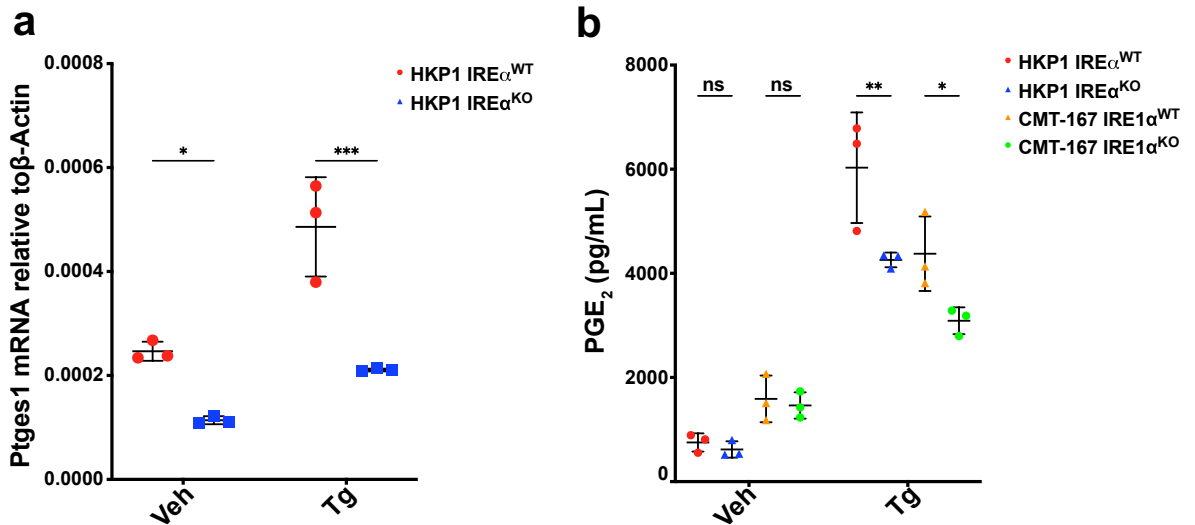

### Supplementary Fig. 12. Reduced $PGE_2$ production in $IRE1\alpha^{KO}$ HKP1 and CMT-167 cells compared to $IRE1\alpha^{WT}$ counterparts

**a**, qPCR of *Ptges* from 12 hour 1  $\mu$ M Tg treated  $IRE1\alpha^{WT}$  (red) and  $IRE1\alpha^{KO}$  (blue) HKP1 (n=3, for each of the four conditions). Data are shown as mean  $\pm$  SD. 2-way ANOVA with Tukey's multiple comparisons test; \* $P$  < 0.05, \*\* $P$  < 0.001, \*\*\* $P$  < 0.0001, ns, non-significant.

**b**,  $PGE_2$  ELISA from 12 hour Vehicle (HKP1,  $P$ =NS, CMT-167,  $P$ =NS) or Tg (HKP1,  $P$ =0.0084, CMT-167,  $P$ =0.0178) treated  $IRE1\alpha^{WT}$  HKP1 (red),  $IRE1\alpha^{KO}$  HKP1 (blue),  $IRE1\alpha^{WT}$  CMT-167 (orange), and  $IRE1\alpha^{KO}$  CMT-167 (green) cells (n=3, for each of the eight conditions). Data are shown as mean  $\pm$  SD. 2-way ANOVA with Tukey's multiple comparisons test; \* $P$  < 0.05, \*\* $P$  < 0.001, \*\*\* $P$  < 0.0001, ns, non-significant.

Data are presented as individual values with box and whisker plots highlighting the median values, and interquartile ranges. Unless otherwise stated, One-way ANOVA with Tukey's multiple comparisons test for ratios; \* $P$  < 0.05, \*\* $P$  < 0.001, \*\*\* $P$  < 0.0001.

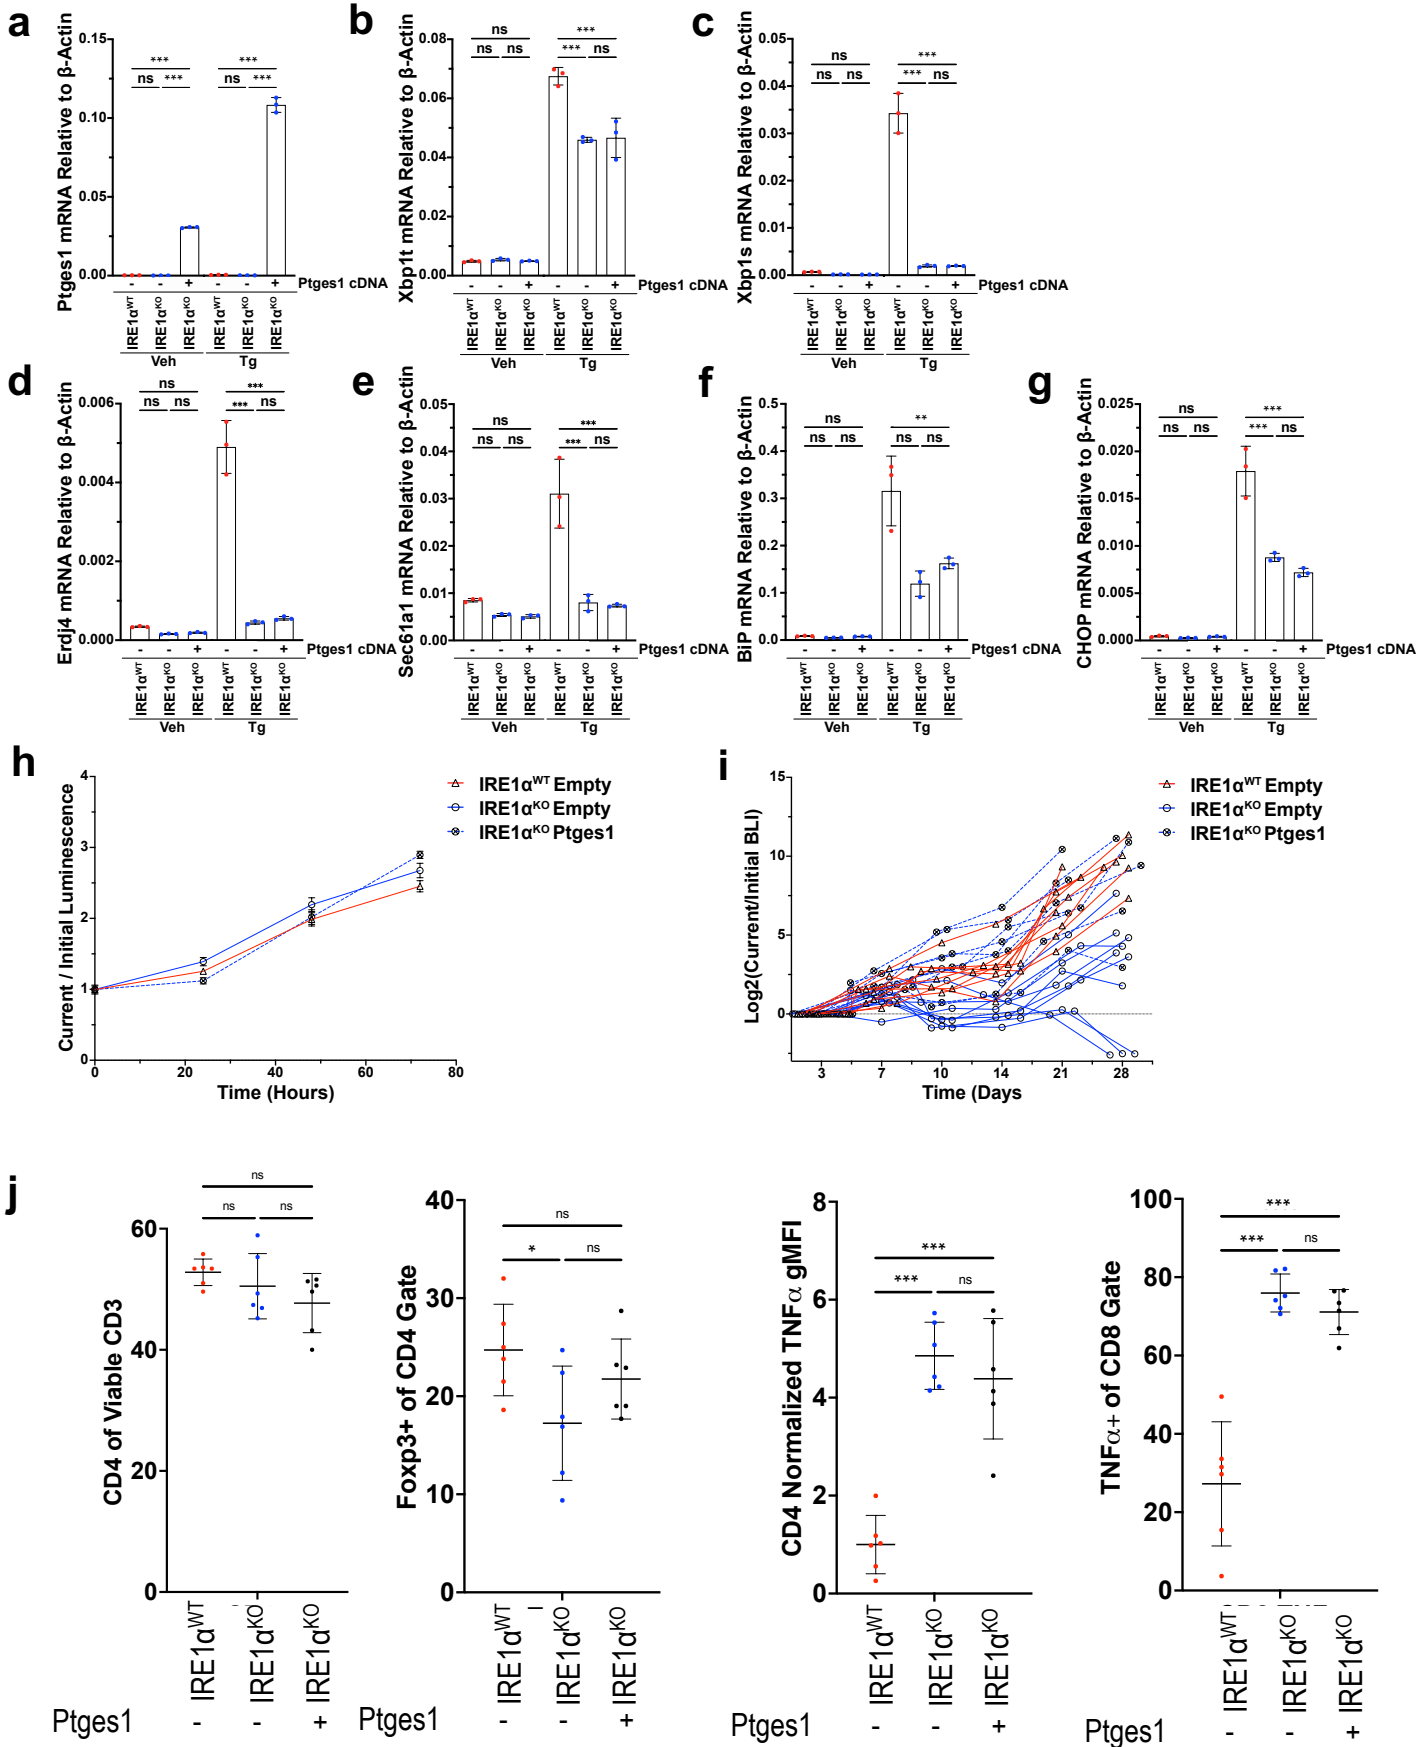

**k**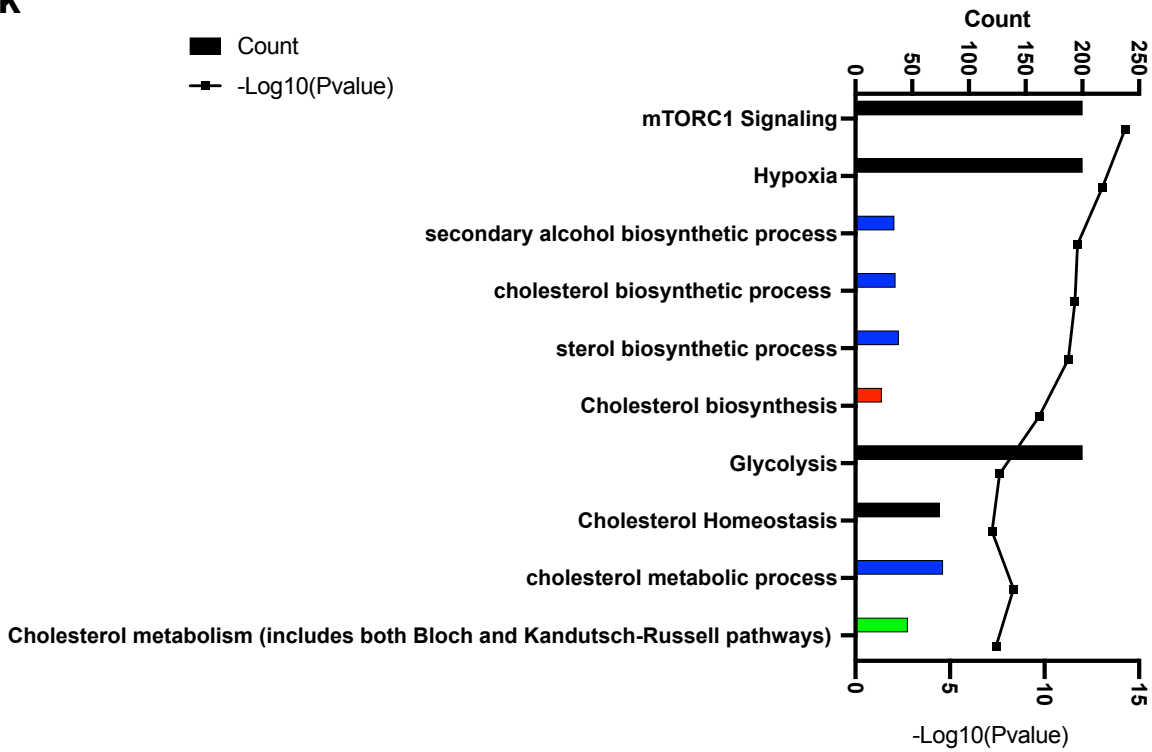

**Supplementary Fig. 13. *Ptges* rescue assays in IRE1 $\alpha$ <sup>WT</sup> or IRE1 $\alpha$ <sup>KO</sup> HKP1 cells and evaluation of cell kinetics.**

**a-g**, Barplots of RT-PCR of *Ptges1* (**a**, WT Veh vs KO Veh,  $p$ =NS, WT Veh vs KO<sup>*Ptges1*</sup> Veh  $p$ <0.001, KO Veh vs KO<sup>*Ptges1*</sup> Veh,  $p$ <0.0001, WT Tg vs KO Tg  $p$ =NS, WT Tg vs KO<sup>*Ptges1*</sup> Tg  $p$ <0.0001, KO Tg vs KO<sup>*Ptges1*</sup> Tg  $p$ <0.0001), *total Xbp1* (**b**, WT Veh vs KO Veh  $p$ =NS, WT Veh vs KO<sup>*Ptges1*</sup> Veh  $p$ =NS, KO Veh vs KO<sup>*Ptges1*</sup> Veh  $p$ =NS, WT Tg vs KO Tg  $p$ <0.0001, WT Tg vs KO<sup>*Ptges1*</sup> Tg  $p$ <0.0001, KO Tg vs KO<sup>*Ptges1*</sup> Tg  $p$ =NS), *Xbp1s* (**c**, WT Veh vs KO Veh  $p$ =NS, WT Veh vs KO<sup>*Ptges1*</sup> Veh  $p$ =NS, KO Veh vs KO<sup>*Ptges1*</sup> Veh  $p$ =NS, WT Tg vs KO Tg  $p$ <0.0001, WT Tg vs KO<sup>*Ptges1*</sup> Tg  $p$ <0.0001, KO Tg vs KO<sup>*Ptges1*</sup> Tg  $p$ =NS), *XBP1s* target genes *Erdj4* (**d**, WT Veh vs KO Veh  $p$ =NS, WT Veh vs KO<sup>*Ptges1*</sup> Veh  $p$ =NS, KO Veh vs KO<sup>*Ptges1*</sup> Veh  $p$ =NS, WT Tg vs KO Tg  $p$ <0.0001, WT Tg vs KO<sup>*Ptges1*</sup> Tg  $p$ <0.0001, KO Tg vs KO<sup>*Ptges1*</sup> Tg  $p$ =NS), *Sec61a1* (**e**, WT Veh vs KO Veh  $p$ =NS, WT Veh vs KO<sup>*Ptges1*</sup> Veh  $p$ =NS, KO Veh vs KO<sup>*Ptges1*</sup> Veh  $p$ =NS, WT Tg vs KO Tg  $p$ <0.0001, WT Tg vs KO<sup>*Ptges1*</sup> Tg  $p$ <0.0001, KO Tg vs KO<sup>*Ptges1*</sup> Tg  $p$ =NS), and global UPR genes *BiP* (**f**, WT Veh vs KO Veh  $p$ =NS, WT Veh vs KO<sup>*Ptges1*</sup> Veh  $p$ =0.0121, KO Veh vs KO<sup>*Ptges1*</sup> Veh  $p$ =0.0115, WT Tg vs KO Tg  $p$ <0.0001, WT Tg vs KO<sup>*Ptges1*</sup> Tg  $p$ =0.0009, KO Tg vs KO<sup>*Ptges1*</sup> Tg  $p$ =NS), *CHOP* (**g**, WT Veh vs KO Veh  $p$ =NS, WT Veh vs KO<sup>*Ptges1*</sup> Veh,  $p$ =NS, KO Veh vs KO<sup>*Ptges1*</sup> Veh  $p$ =NS, WT Tg vs KO Tg  $p$ <0.0001, WT Tg vs KO<sup>*Ptges1*</sup> Tg  $p$ <0.005, KO Tg vs KO<sup>*Ptges1*</sup> Tg,  $p$ =NS)) in IRE1 $\alpha$ <sup>WT</sup> empty vector (red) vs IRE1 $\alpha$ <sup>KO</sup> empty vector or *Ptges* cDNA HKP1 cells (blue), treated with vehicle or 6 hours 1  $\mu$ M Thapsigargin ( $n$ =3, for each of the 6 conditions). Data are shown as mean  $\pm$  SD. 2-way ANOVA with Tukey's multiple comparisons test; \* $P$  < 0.05, \*\* $P$  < 0.001, \*\*\* $P$  < 0.0001, ns, non-significant.

**h**, Cell viability in IRE1 $\alpha$ <sup>WT</sup> empty vector (red), IRE1 $\alpha$ <sup>KO</sup> empty vector (light blue), and IRE1 $\alpha$ <sup>KO</sup> *Ptges1* cDNA HKP1 cells (blue), evaluated for 72 hours (WT vs KO  $p$ =NS, WT vs KO<sup>*Ptges1*</sup>  $p$ =NS, KO vs KO<sup>*Ptges1*</sup>  $p$ =NS). Line graphs are presented with mean values as a symbol  $\pm$  SD at each time point. Analyses of different time points were performed using 2-way ANOVA with Tukey's multiple comparisons test; \* $P$  < 0.05, \*\* $P$  < 0.001, \*\*\* $P$  < 0.0001.

**i.** BLI spider plots of longitudinally tracked *in vivo*  $IRE1\alpha^{WT}$  empty vector (red, n = 10),  $IRE1\alpha^{KO}$  empty vector (blue, n = 10) and  $IRE1\alpha^{KO}$  *Ptges* cDNA (blue broken line, n = 10) HKP1 tumors. Data are shown as individual tracings of mice, relative to their log transformed day 3 measurement. Analyses of different time points in tumor progression were performed using 2-way ANOVA with Tukey's multiple comparisons test; \* $P < 0.05$ , \*\* $P < 0.001$ , \*\*\* $P < 0.0001$

**j.** Flow cytometry data for CD4 (WT vs KO, p=NS, WT vs  $KO^{Ptges1}$ , P=NS, KO vs  $KO^{Ptges1}$ , P=NS), T-regs (WT vs KO P=0.0467, WT vs  $KO^{Ptges1}$  P=NS, KO vs  $KO^{Ptges1}$  P=NS), CD4 normalized  $TNF\alpha^+$  (WT vs KO, P<0.0001, WT vs  $KO^{Ptges1}$  P<0.0001, KO vs  $KO^{Ptges1}$ , P=NS) and CD8 normalized  $TNF\alpha^+$  (WT vs KO, P<0.0001, WT vs  $KO^{Ptges1}$ , P<0.0001, KO vs  $KO^{Ptges1}$  p=NS) from  $IRE1\alpha^{WT}$  (red, n=6) vs  $IRE1\alpha^{KO}$  (blue, n=6) and  $IRE1\alpha^{KO}$  with *Ptges1* (black, n=6) HKP1 tumor bearing lungs (Box and whisker plots are presented as mean  $\pm$  SD).

**k.** Pathway enrichments in  $IRE1\alpha^{KO}$  downregulated signature genes. Count of genes is represented as a barplot, and the plotted  $-\log_{10}p$ -values are represented as a dot above its corresponding bar.

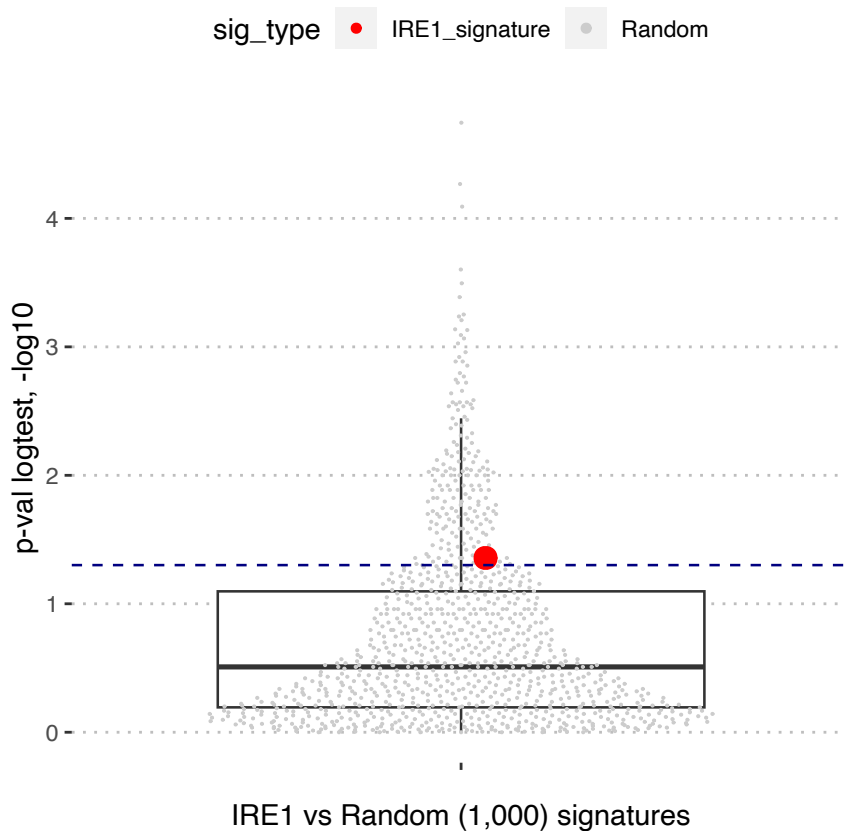

**Supplementary Fig. 14. Multivariate analysis showing OS) and *IRE1* $\alpha$ <sup>KO</sup> signature status.**

Multivariate Cox proportional-hazards regression models for IRE1 $\alpha$  versus 1,000 random signatures of identical lengths. Red dot denotes the p-values from survival model for IRE1 $\alpha$  signature and gray dots denote the p-values from survival model for random signatures. Blue dashed line denotes p-values of 0.05. Out of n=1,001 signatures (1 IRE1 $\alpha$  and 1,000 random), 178/1000 random signatures were significant in multivariate survival models. So, specificity =  $100 * TN / (FP + TN) = 100 * (822 / (178 + 822)) = 82.2\%$ . Data are presented as a box and whisker plot, with the median value highlighted, and interquartile ranges.

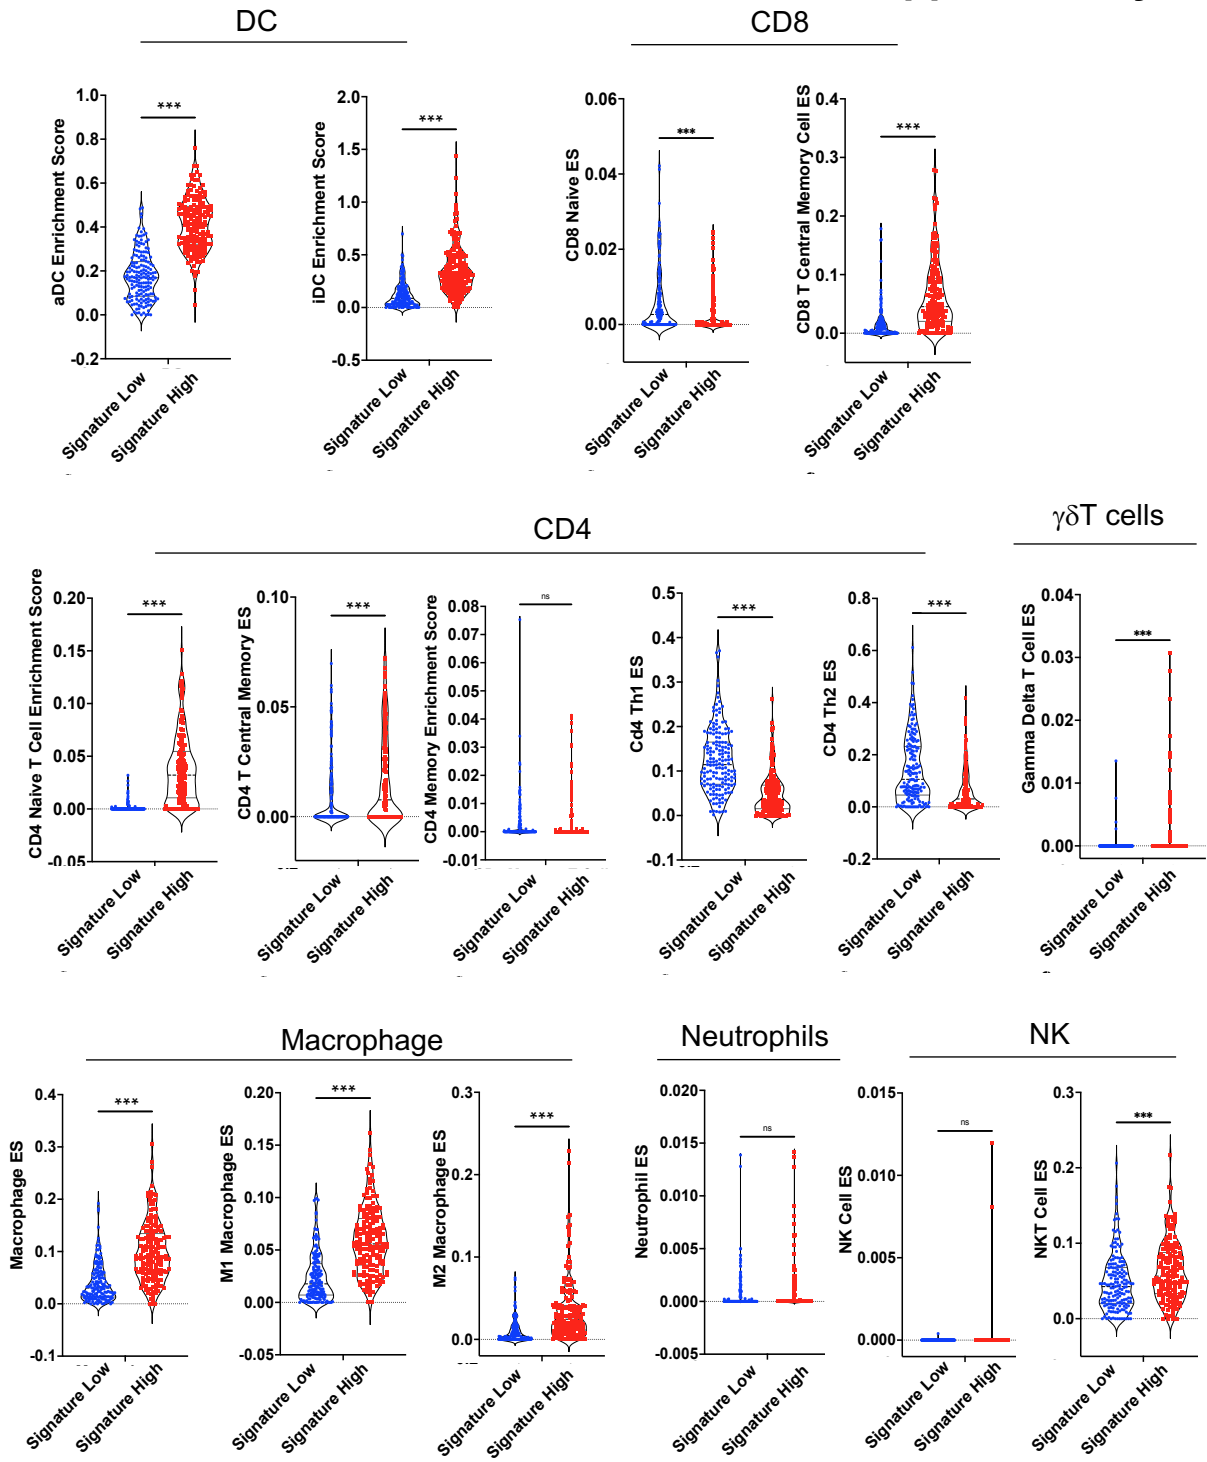

**Supplementary Fig. 15. Signature evaluation, RNA-seq analysis and deconvolution.**

Violin plots of xCell pipeline deconvolution of TCGA LUAD patients from the high (red,  $n=166$ ) or low (blue,  $n=165$ ) groups showing enrichment of aDC ( $P < 0.0001$ ), iDC ( $P < 0.0001$ ), CD8 naive ( $P=0.0001$ ), CD8 central memory ( $P < 0.0001$ ), CD4 naive ( $P < 0.0001$ ), CD4 TCM ( $P < 0.0001$ ), CD4 memory ( $p=NS$ ), CD4 Th1 ( $p < 0.0001$ ), Cd4 Th2 ( $P < 0.0001$ ), Gamma delta ( $P < 0.0001$ ), Macrophages ( $p < 0.0001$ ), M1 macrophages ( $P < 0.0001$ ), M2 macrophages ( $P < 0.0001$ ), Neutrophil ( $p=NS$ ), NK ( $p=NS$ ), and NKT ( $P=0.0005$ ). Unpaired Student's t-test. \* $P < 0.05$ , \*\* $P < 0.001$ , \*\*\* $P < 0.0001$ .

## Supplementary Table 1.

| <b>N=232</b>           |                                   |                                    |                  |
|------------------------|-----------------------------------|------------------------------------|------------------|
|                        | <b><i>XBP1s</i> Low<br/>N=116</b> | <b><i>XBP1s</i> High<br/>N=116</b> | <b>'p' value</b> |
| <b>Gender</b>          |                                   |                                    |                  |
| Female                 | 61 (53%)                          | 66 (57%)                           | p=0.510          |
| Male                   | 55 (47%)                          | 50 (43%)                           |                  |
| <b>Smoking</b>         |                                   |                                    |                  |
| No (1 or 2)            | 51 (45%)                          | 44 (39%)                           | p=0.344          |
| Yes (2 or 3)           | 61 (55%)                          | 68 (61%)                           |                  |
| <b>Path stage</b>      |                                   |                                    |                  |
| IA/IB                  | 62 (53%)                          | 57 (49%)                           | p=0.796          |
| IIA/IIB                | 31 (27%)                          | 33 (28%)                           |                  |
| III/IV                 | 23 (20%)                          | 26 (22%)                           |                  |
| <b>Path 'T' stage</b>  |                                   |                                    |                  |
| T1a/T1b                | 30 (26%)                          | 37 (32%)                           | p=0.539          |
| T2a/T2b                | 72 (62%)                          | 64 (55%)                           |                  |
| T3/T4                  | 14 (12%)                          | 15 (13%)                           |                  |
| <b>Path 'N' status</b> |                                   |                                    |                  |
| Nx/N0                  | 76 (66%)                          | 71 (61%)                           | p=0.496          |
| Positive LN (N1/N2]    | 40 (34%)                          | 45 (39%)                           |                  |
| <b>Neo-adjuvant</b>    |                                   |                                    |                  |
| No                     | 116 (100%)                        | 114 (99%)                          | p=0.314          |
| Yes                    | 0 (0%)                            | 1 (1%)                             |                  |
| <b>Vital status</b>    |                                   |                                    |                  |
| Death                  | 26 (22%)                          | 36 (31%)                           | p=0.138          |

### Supplementary Table 1: *XBP1s* enrichment does not correlate with clinicopathologic factors.

Evaluation of gender, smoking, pathologic stage, T, N and M stages, neoadjuvant treatments with *XBP1s* High (n=116) or Low (n=116) status. All comparisons performed using the chi-square test. \* denotes  $P < 0.05$ , \*\* denotes  $P < 0.001$ , \*\*\* denotes  $P < 0.0001$



## Supplementary Table 2.

| Characteristic                                                                | HR <sup>1,2</sup> | SE <sup>2</sup> | 95% CI <sup>2</sup> | p-value |
|-------------------------------------------------------------------------------|-------------------|-----------------|---------------------|---------|
| XBP1_Splicing_Status                                                          |                   |                 |                     |         |
| High                                                                          | —                 | —               | —                   |         |
| Low                                                                           | 0.60*             | 0.241           | 0.38, 0.97          | 0.037   |
| Diagnosis.Age                                                                 |                   |                 |                     |         |
|                                                                               | 1.01              | 0.013           | 0.99, 1.04          | 0.3     |
| Path_stage                                                                    |                   |                 |                     |         |
| Stage I                                                                       | —                 | —               | —                   |         |
| Stage II                                                                      | 0.86              | 0.530           | 0.30, 2.43          | 0.8     |
| Stage III                                                                     | 0.97              | 0.636           | 0.28, 3.37          | >0.9    |
| Stage IV                                                                      | 0.92              | 0.741           | 0.22, 3.95          | >0.9    |
| Path_T_stage                                                                  |                   |                 |                     |         |
| T1                                                                            | —                 | —               | —                   |         |
| T2                                                                            | 1.17              | 0.288           | 0.66, 2.05          | 0.6     |
| T3/T4                                                                         | 2.86*             | 0.485           | 1.11, 7.39          | 0.030   |
| Path_N_stage                                                                  |                   |                 |                     |         |
| Nx/N0                                                                         | —                 | —               | —                   |         |
| N1/N2/N3                                                                      | 2.56              | 0.505           | 0.95, 6.89          | 0.063   |
| Smoking_history                                                               |                   |                 |                     |         |
| Non-Smoker                                                                    | —                 | —               | —                   |         |
| Current Smoker                                                                | 1.27              | 0.412           | 0.57, 2.84          | 0.6     |
| Current Smoker Reformed                                                       | 1.55              | 0.376           | 0.74, 3.24          | 0.2     |
| <sup>1</sup> *p<0.05; **p<0.01; ***p<0.001                                    |                   |                 |                     |         |
| <sup>2</sup> HR = Hazard Ratio, SE = Standard Error, CI = Confidence Interval |                   |                 |                     |         |

**Supplementary Table 2.** Multivariate analysis showing overall survival (OS) and *XBP1s* in TCGA-LUAD. High is upper tertile and low is bottom tertile of the XBP1 Splicing Scores. Low XBP1 group is reference population. HR is hazard ratio and p is log-rank p-value from the multivariate Cox proportional-hazards regression model adjusted for age at the time of diagnosis, gender, pathology and TN stages.

### Supplementary Table 3

| Log2 FC | FDR   | P-value | Up/down | # Genes | 25% OS  | 33% OS  |
|---------|-------|---------|---------|---------|---------|---------|
| -       | 0.01  | 0.05    | Up      | 1054    | 0.0026  | 0.016   |
| -       | 0.01  | 0.05    | Down    | 1179    | 0.00068 | <0.0001 |
| 1.00    | 0.01  | 0.05    | Up      | 582     | 0.0054  | 0.0043  |
| 1.00    | 0.01  | 0.05    | Down    | 144     | 0.032   | 0.03    |
| 1.00    | 0.001 | 0.05    | Up      | 323     | 0.013   | 0.019   |
| 1.00    | 0.001 | 0.05    | Down    | 95      | 0.068   | 0.07    |
| 1.50    | 0.001 | 0.05    | Up      | 238     | 0.00087 | 0.0065  |
| 1.50    | 0.001 | 0.05    | Down    | 38      | 0.44    | 0.61    |
| 2.00    | 0.001 | 0.05    | Up      | 171     | 0.00045 | 0.0041  |
| 2.00    | 0.001 | 0.05    | Down    | 21      | 0.81    | 0.99    |

**Supplementary Table 3.** IRE1 $\alpha$ <sup>KO</sup> gene signatures with indicated cut-off values. Log2FC>1 and FDR 0.01 highlighted in red.

## Supplementary Table 4

| Target Gene              | Species | Forward Sequence                           | Reverse Sequence                      | Experiment        |
|--------------------------|---------|--------------------------------------------|---------------------------------------|-------------------|
| Xbp1t                    | Mouse   | GACAGAGAGTCAAACCTAACGTGG                   | GTCCAGCAGGCAAGAAGGT                   | qPCR              |
| Xbp1s                    | Mouse   | AAGAACACGCTTGGGAATGG                       | CTGCACCTGCTGCGGAC                     | qPCR              |
| Erdj4                    | Mouse   | TAAAAGCCCTGATGCTGAAGC                      | TCCGACTATTGGCATCCGA                   | qPCR              |
| Sec61a1                  | Mouse   | CTATTTCCAGGGCTTCCGAGT                      | AGGTGTTGACTGGCCTCGGT                  | qPCR              |
| Sec24d                   | Mouse   | TCCACTCTCCCCATGGTTTA                       | GCTATATCCGCTGCACTACG                  | qPCR              |
| Sec63                    | Mouse   | GTGGACTACAGCGTTTGCACA                      | CATATCAGCCCTCACTGCTGC                 | qPCR              |
| Edem1                    | Mouse   | AAGCCCTCTGGAACCTGCG                        | AACCCAATGGCCTGTCTGG                   | qPCR              |
| Hyou1                    | Mouse   | TGCGCTTCCAGATCAGTCC                        | GGAGTAGTTCAGAACCATGCC                 | qPCR              |
| BiP                      | Mouse   | TCATCGGACGCACTTGAA                         | CAACCACCTTGAATGGCAAGA                 | qPCR              |
| Chop                     | Mouse   | GTCCCTAGCTTGGCTGACAGA                      | TGGAGAGCGAGGGCTTTG                    | qPCR              |
| Atf6                     | Mouse   | GACTCACCCATCCGAGTTGTG                      | CTCCCAGTCTTCATCTGGTCC                 | qPCR              |
| Ptges                    | Mouse   | AGCACACTGCTGGTCATCAA                       | TTGGCAAAGCCTTCTTCCGC                  | qPCR              |
| Bloc1s1                  | Mouse   | CACCCAGCCAGACTCGAC                         | GCAGCGATAGCTTCTCTCCTC                 | qPCR              |
| Ergic3                   | Mouse   | GAAGCAGTTCGATGCCTACCC                      | ACTCCGATAGGAAAAGCAGGA                 | qPCR              |
| Gapdh                    | Mouse   | GGTCTCAGTGTAGCCCAAG                        | AATGTGTCCGTCGTGGATCT                  | qPCR              |
| b-actin                  | Mouse   | CTAAGGCCAACCGTGAAAAG                       | ACCAGAGGCATACAGGGACA                  | qPCR              |
| IRE1 $\alpha$ _crRNA     | Mouse   | TCAGATGGAATCCTCTACAT                       | NA                                    | NEON Cas9 Editing |
| IRE1 $\alpha$ Sequencing | Mouse   | AGAGTGACAACAGCCTGCTC                       | CCAGCAAGAGACCCCATCTG                  | Sequencing        |
| Mouse Ptges1 Cloning     | Mouse   | ATGAATTCGCCACCATGCCTTCCCCGGG<br>CCTGGTGATG | ATGCGGCCGCTCACAGATGGTGG<br>GCCACCTCCC | Rescue Cloning    |
| Mouse Xbp1s Cloning      | Mouse   | ATGAATTCGCCACCATGGTGGTGGTGG<br>CAGCGGCGCC  | ATGCGGCCGCTTAGACACTAATCA<br>GCTGGGGG  | Rescue Cloning    |

**Supplementary Table 4.** qPCR, CRISPR-Cas9 editing sanger sequencing, and cloning primers

## Supplementary Table 5

| Target Gene         | Clone    | Fluorophore               | Company        | Dilution  | Experiment |
|---------------------|----------|---------------------------|----------------|-----------|------------|
| CD103               | 2E7      | PE                        | BioLegend      | 1 to 100  | FACS       |
| CD11b               | M1/70    | BV605                     | BioLegend      | 1 to 100  | FACS       |
| Zombie-Aqua         | NA       | Bv510                     | Biolegend      | 1 to 100  | FACS       |
| MHC I (H-2Kb/H-2Db) | 28-8-6   | FITC                      | BioLegend      | 1 to 100  | FACS       |
| CD45                | 30-F11   | APC-Cy7                   | BioLegend      | 1 to 100  | FACS       |
| CD11c               | N418     | PE-Cy7                    | BioLegend      | 1 to 100  | FACS       |
| CD24                | 30-F1    | Percp-Cy5.5               | BioLegend      | 1 to 100  | FACS       |
| Ly6g                | 1A8      | Bv421 / Pac Blue/<br>Dapi | BioLegend      | 1 to 100  | FACS       |
| CD64                | 10.1     | Bv711                     | BioLegend      | 1 to 100  | FACS       |
| Ly6c                | HK1.4    | Bv785                     | Biolegend      | 1 to 100  | FACS       |
| IFNg                | XMG1.2   | FITC                      | Biolegend      | 1 to 100  | FACS       |
| TNFa                | mAb11    | Percp-Cy5.5               | Biolegend      | 1 to 100  | FACS       |
| F4/80               | QA17A29  | Pacific Blue              | Biolegend      | 1 to 100  | FACS       |
| CD3                 | 17A2     | PE                        | BioLegend      | 1 to 100  | FACS       |
| CD8a                | 53-6.7   | PE-Cy7                    | BioLegend      | 1 to 100  | FACS       |
| Gzmb                | QA16A02  | APC / A-647               | BioLegend      | 1 to 100  | FACS       |
| Cd4                 | RM4-5    | Pacific Blue              | BioLegend      | 1 to 100  | FACS       |
| Foxp3               | FJK-16s  | FITC                      | BioLegend      | 1 to 100  | FACS       |
| Ki-67               | 16A8     | APC / A-647               | BioLegend      | 1 to 100  | FACS       |
| PD1 (Cd279)         | 29F.1A12 | APC-Cy7                   | BioLegend      | 1 to 100  | FACS       |
| XBP1s               | Q3-695   | AF647                     | BD Biosciences | 1 to 100  | FACS       |
| IRE1 $\alpha$       | 14C10    | NA                        | Cell Signaling | 1 to 1000 | WB         |
| XBP1s               | 9D11A43  | NA                        | Biolegend      | 1 to 1000 | WB         |

**Supplementary Table 5** Flow Cytometry and western blot antibodies
