# Supplementary material for: Tumor-intrinsic IRE1α signaling controls protective immunity in lung cancer
Source: PubMed Central journal article supplement (PMC9829901; doi:10.1038/s41467-022-35584-9), 2023-01-09
Supplement: 41467_2022_35584_MOESM2_ESM.pdf [file 41467_2022_35584_MOESM2_ESM.pdf]

## **Description of Additional Supplementary Files**

**Supplementary Data 1:** Differentially expressed genes between IRE1 $\alpha$ KO vs IRE1 $\alpha$ WT HKP1

**Supplementary Data 2:** Enricher analysis IRE1 $\alpha$ KO vs WT (WT all genes)

**Supplementary Data 3:** Immunomodulator database
